# Supplementary material for: A laboratory study on the uptake of gaseous molecular iodine by clay minerals at different relative humidities
Source: Royal Society of Chemistry journal article supplement (doi:10.1039/d2ea00039c), 2022-01-01
Supplement: d2ea00039c1.pdf [file d2ea00039c1.pdf]

## Supplementary Information

# A laboratory study on the uptake of gaseous molecular iodine by clay minerals at different relative humidities

Shuzo Kutsuna\* and Naoki Kaneyasu

National Institute of Advanced Industrial Science and Technology (AIST),

16-1 Onogawa, Tsukuba, Ibaraki 305 8569, JAPAN

## 1. SUPPORTING INFORMATION FOR SECTION 2.2

### S1.1. Experimental Conditions

Table S1. Experimental flow rates and mass-flow controllers

| Flow (Fig. 1)                        | Mass-flow controller    | gas                  | Flow rate at 298.2 K ( $10^{-3} \text{ dm}^3 \text{ s}^{-1}$ ) |                     |                     |                     |
|--------------------------------------|-------------------------|----------------------|----------------------------------------------------------------|---------------------|---------------------|---------------------|
|                                      |                         |                      | 20% RH                                                         | 50% RH              | 80% RH              | 96% RH              |
| F4                                   | SEC-E40 <sup>a</sup>    | air                  | 5.5341                                                         | 3.3496              | 1.1651              | 0                   |
| F5                                   | SEC-E40 <sup>a</sup>    | humidified air       | 1.4706 <sup>c</sup>                                            | 3.6214 <sup>c</sup> | 5.8274 <sup>c</sup> | 7.0590 <sup>c</sup> |
| F1                                   | SEC-400MK3 <sup>a</sup> | air                  |                                                                | 0.1790              |                     |                     |
| F2                                   | SEC-400MK3 <sup>a</sup> | air                  |                                                                | 0.2078              |                     |                     |
| F3                                   | SEC-E40 <sup>a</sup>    | CO <sub>2</sub> -air |                                                                | 0.2856              |                     |                     |
| F6                                   | type 11598 <sup>b</sup> | air                  |                                                                | 0.0242              |                     |                     |
| F7                                   | SEC-400MK3 <sup>a</sup> | air                  |                                                                | 1.6534              |                     |                     |
| F8                                   | SEC-400MK3 <sup>a</sup> | air                  |                                                                | 1.6591              |                     |                     |
| F <sub>out</sub> = F3 + F4 + F5 + F6 |                         |                      | 7.3145                                                         | 7.2808              | 7.3023              | 7.3688              |

<sup>a</sup> Purchased from HORIBA STEC.; <sup>b</sup> Purchased from MKS.

<sup>c</sup> Each value is (F5 of air) + (flow rate of water vapor, 1.2% by volume).

**S1.2. Calibration of I<sub>2</sub>–Air Mixtures and IBBCEAS System.** The partial pressure of I<sub>2</sub> in I<sub>2</sub>–air(o),  $P_{\text{in-o}}$ , was determined by bubbling I<sub>2</sub>–air(o) into 20 mL of 20 mM aqueous NaOH solution in an impinger (Figure 1, f). I<sub>2</sub> was transformed into I<sup>−</sup> and IO<sub>3</sub><sup>−</sup> according to reaction R2. The I<sup>−</sup> and IO<sub>3</sub><sup>−</sup> concentration produced in the solutions was determined with an ion chromatograph (Dionex ICS-2100, Thermo Fisher Scientific) in which an aqueous KOH solution was used at a flow rate of 1.0 mL min<sup>−1</sup> to elute I<sup>−</sup> and IO<sub>3</sub><sup>−</sup> from the IonPac AS-20 column (4 mm i.d., 250 mm long) at 308 K. The KOH concentration was gradually increased from 2.5 to 45 mM according to a timed program. Four experimental runs were conducted (Table S2). A second impinger installed downstream from the first one was used to verify the high efficiency of the bubbling system in trapping gaseous I<sub>2</sub>. Concentrations of I<sup>−</sup> and IO<sub>3</sub><sup>−</sup> in the second impinger were below detection limits. Molar ratios of I<sup>−</sup> to IO<sub>3</sub><sup>−</sup> were within 3% of the ratio expected from reaction R2.

The value of  $P_{\text{in-o}}$  was calculated at  $7.08 \pm 0.09$  Pa from the IO<sub>3</sub><sup>−</sup> concentration, and the volume of I<sub>2</sub>–air(o) introduced into the solution as the average of four measurements. Errors represent a standard deviation. Uncertainty of  $P_{\text{in-o}}$  was estimated at about 3% ( $\pm 0.21$  Pa) because molar ratios of I<sup>−</sup> to IO<sub>3</sub><sup>−</sup> were within 3% of the ratio expected from reaction R2. From this value, the partial pressure of I<sub>2</sub> in the synthetic air passing through the PFA bottle (Figure 1, a) was calculated at  $15.3 \pm 0.05$  Pa, or 0.88 times the saturated vapor pressure (17.14 Pa) of I<sub>2</sub> reported at the preset temperature (288.2 K),<sup>1</sup> and the partial pressure of I<sub>2</sub> in I<sub>2</sub>–air(s), with  $P_0$  as  $P_{\text{in}}$  with a syringe pump speed ( $F_s$ ) of  $4.17 \times 10^{-5}$  dm<sup>3</sup> s<sup>−1</sup>, was calculated at  $40.5 \pm 1.2$  mPa, for a  $0.40 \pm 0.01$  ppmv concentration.

**Table S2. Concentrations of I<sup>−</sup> and IO<sub>3</sub><sup>−</sup> in aqueous NaOH into which I<sub>2</sub>–air(o) was bubbled.**

| Run No  | Procedure for introducing I <sub>2</sub> –air(o) |       |                           | I <sup>−</sup><br>(ppmw) <sup>a</sup> | IO <sub>3</sub> <sup>−</sup><br>(ppmw) <sup>a</sup> | Mole ratio<br>of I <sup>−</sup> /IO <sub>3</sub> <sup>−</sup> | Partial pressure of I <sub>2</sub><br>in I <sub>2</sub> –air(o) (Pa) <sup>b</sup> |
|---------|--------------------------------------------------|-------|---------------------------|---------------------------------------|-----------------------------------------------------|---------------------------------------------------------------|-----------------------------------------------------------------------------------|
|         | Start                                            | Stop  | Volume (dm <sup>3</sup> ) |                                       |                                                     |                                                               |                                                                                   |
| 1       | 12:30                                            | 13:30 | 1.3926                    | 43.9                                  | 11.8                                                | 5.14                                                          | 7.19                                                                              |
| 2       | 13:46                                            | 14:50 | 1.4854                    | 46.0                                  | 12.4                                                | 5.12                                                          | 7.08                                                                              |
| 3       | 15:05                                            | 16:05 | 1.3926                    | 42.7                                  | 11.6                                                | 5.07                                                          | 7.08                                                                              |
| 4       | 16:19                                            | 17:19 | 1.3926                    | 42.3                                  | 11.4                                                | 5.11                                                          | 6.97                                                                              |
| average |                                                  |       |                           |                                       |                                                     |                                                               | 7.08 (0.09) <sup>c</sup>                                                          |

<sup>a</sup> Concentration in NaOH solution in the first impinger.

<sup>b</sup> Calculated from concentration of IO<sub>3</sub><sup>−</sup> in the solution.

<sup>c</sup> Number in parenthesis represents one standard deviation.

### S1.3. Specification of the Contactor

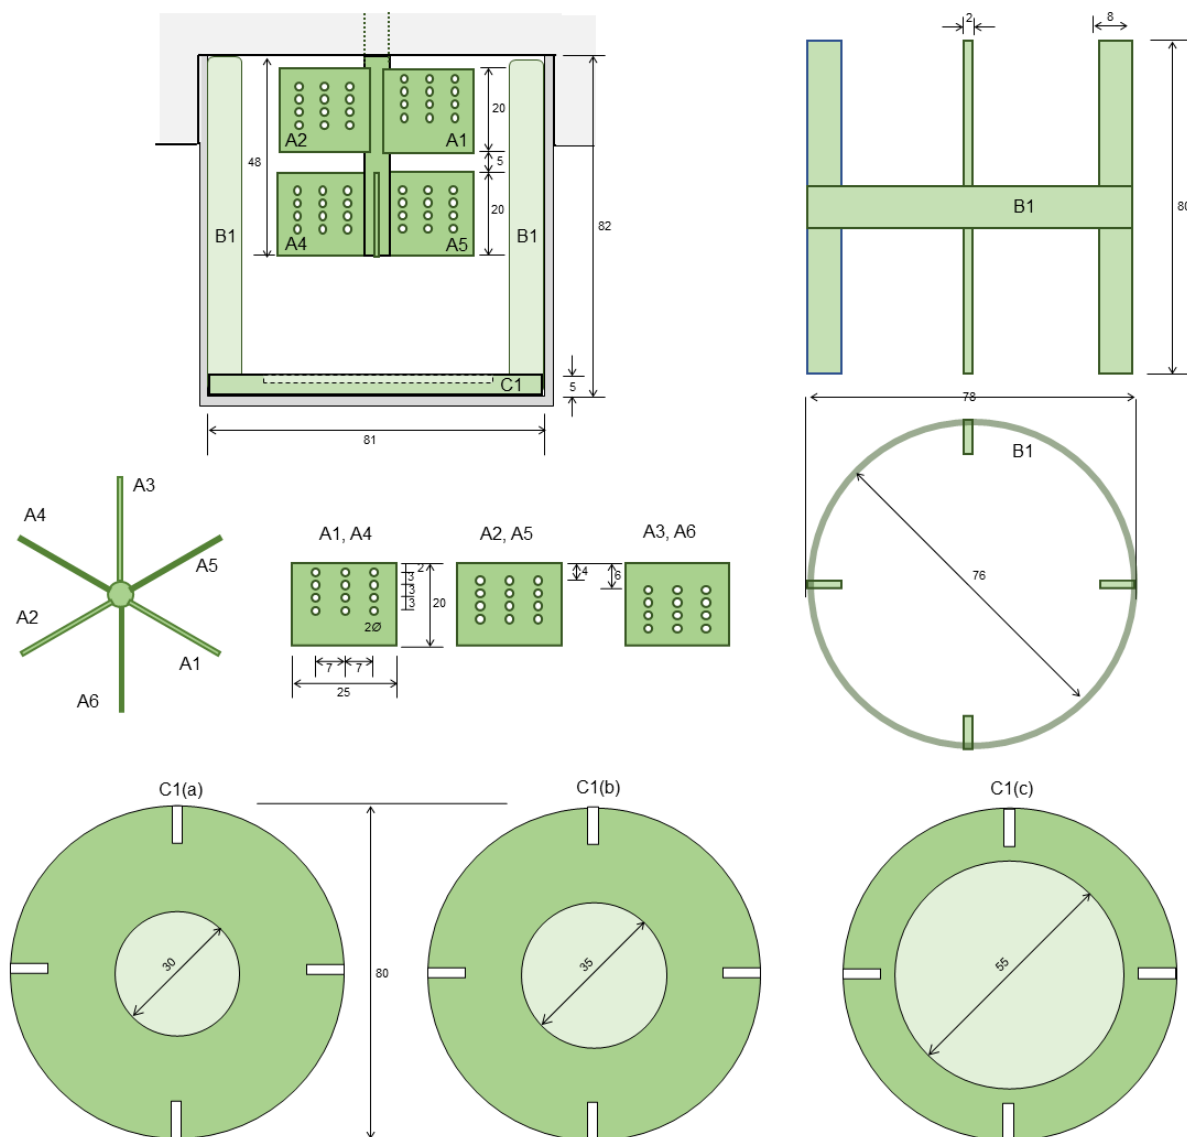

**Figure S1.** Schematic diagrams of the contactor and details of the PTFE-coated gas-mixing turbine, PTFE-coated stainless-steel baffles, and PTFE dishes with basins. Dimensions are in millimeters. The basin depth is 4 mm for C1(a), 2 mm for C1(b), and 2 or 4 mm for C1(c).

## S2. SUPPORTING INFORMATION FOR SECTION 2.3

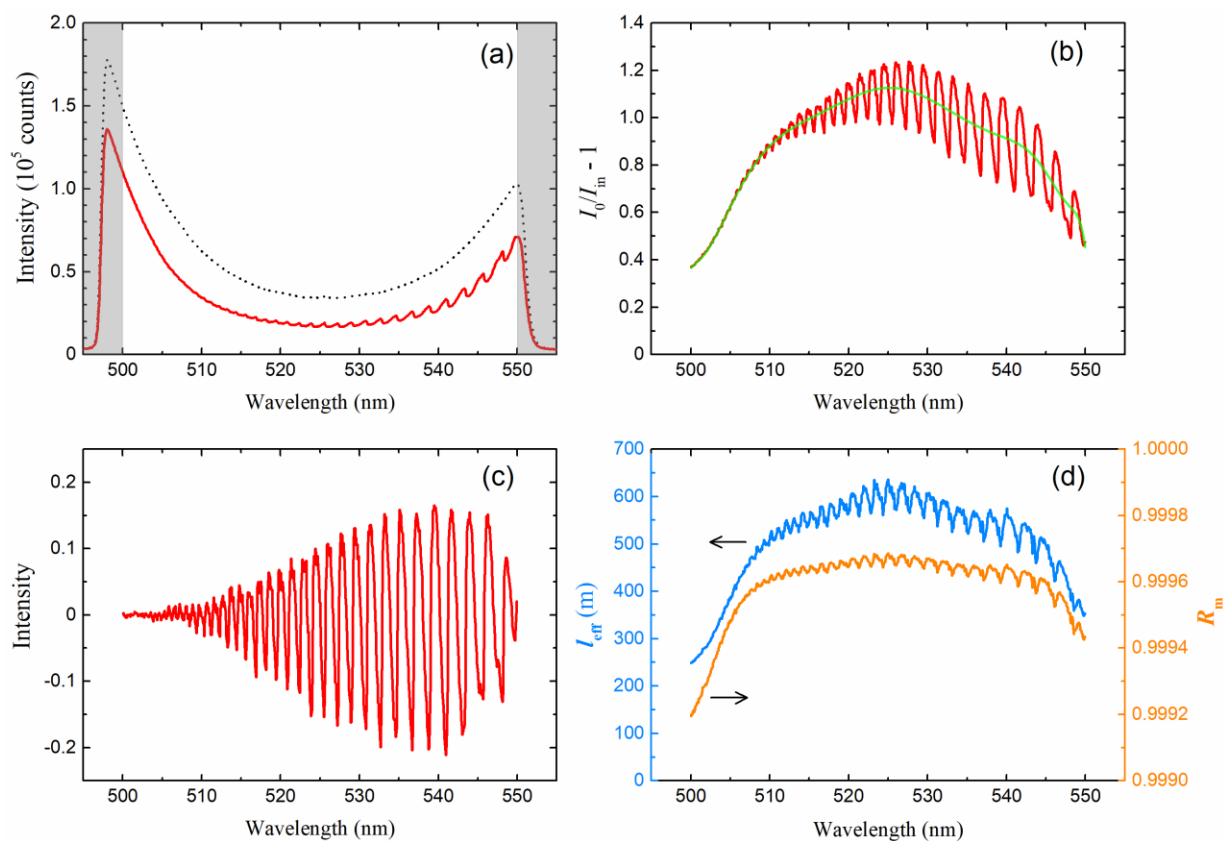

**Figure S2.** Examples of measured IBBCEAS spectra of gas mixtures. (a) Transmitted intensity spectrum ( $I_0$ ) for the  $\text{CO}_2$ -air gas mixture ( $\text{CO}_2$ ,  $2.8 \times 10^{-4}$  atm; gray dashed curve) and spectrum ( $I_{in}$ ) of  $\text{I}_2$ -air(s) ( $\text{I}_2$ ,  $2.8 \times 10^{-7}$  atm;  $\text{CO}_2$ ,  $2.8 \times 10^{-4}$  atm; red curve). (b) Spectrum of  $(I_0/I_{in} - 1)$  calculated from (a) by eqn (2) (red curve) fitted by a polynomial of order 19 as a smoothing curve (green curve). (c) Residual  $(I_0/I_{in} - 1)$  spectrum after subtracting the smoothing curve in (b). (d) Effective pathlength ( $I_{eff}$ ) in IBBCEAS (blue curve) and mirror reflectivity ( $R_m$ ) (orange curve), estimated from the IBBCEAS spectrum and the partial pressure of  $\text{I}_2$  in  $\text{I}_2$ -air(s) determined from ion chromatograph analysis (section 2.2.1).

### S3. SUPPORTING INFORMATION FOR SECTION 2.4.2

**S3.1. Fitting Rectangular Input Pulse Signals by eqn (13)–(15).** The time series of  $f_m(t)$  for 0–300 s and 300–1500 s was well reproduced by nonlinear fitting using eqn (13) and (14), respectively (Figure S3).

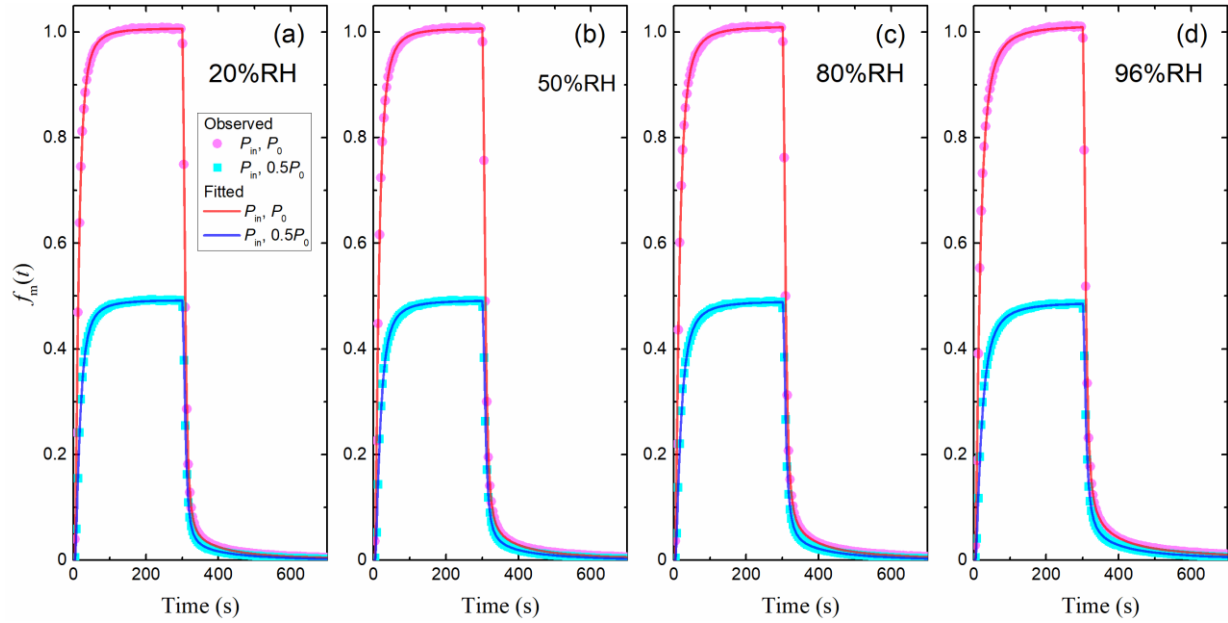

**Figure S3.** Time series of  $f_m(t)$  for  $P_0$  as  $P_{in}$  (pink circles) and  $0.5P_0$  as  $P_{in}$  (blue squares) after the start of injection by the sampling pump at (a) 20% RH, (b) 50% RH, (c) 80% RH, and (d) 96% RH. Curves represent fits to the data by eqn (13) and (14).

The values of parameters  $a_i$  and  $b_i$  in eqn (13) and (14) thus determined are listed in Table S3.

**Table S3. Parameters for eqn (13) and (14)**

|                                    | Input, $P_0$ |          |          |          | Input, $0.5P_0$ |          |          |          |
|------------------------------------|--------------|----------|----------|----------|-----------------|----------|----------|----------|
|                                    | 20% RH       | 50% RH   | 80% RH   | 96% RH   | 20% RH          | 50% RH   | 80% RH   | 96% RH   |
| $a_1$                              | -0.09411     | -0.10269 | -0.11810 | -0.13714 | -0.04586        | -0.04943 | -0.05277 | -0.05258 |
| $a_2$                              | 1.0075       | 1.0080   | 1.0114   | 1.0132   | 0.4930          | 0.4924   | 0.4907   | 0.4887   |
| $a_3$                              | 12.688       | 13.033   | 13.130   | 13.972   | 16.245          | 16.845   | 17.153   | 18.746   |
| $a_4$                              | 2.1994       | 2.1168   | 2.0001   | 1.8482   | 2.1158          | 2.0336   | 1.9517   | 1.8482   |
| $b_1$                              | 0.74950      | 0.76558  | 0.74669  | 0.78500  | 0.36919         | 0.36528  | 0.44599  | 0.42292  |
| $b_2$                              | 9.0331       | 9.0260   | 9.1569   | 9.0146   | 9.4392          | 9.5523   | 8.9424   | 9.1095   |
| $b_3$                              | 2.5449       | 2.4860   | 2.4818   | 2.3827   | 2.4630          | 2.4449   | 2.1226   | 2.1007   |
| $b_4$                              | 0.1996       | 0.1727   | 0.1802   | 0.1193   | 0.0768          | 0.0682   | 0.0193   | 0.0356   |
| $b_5$                              | 0.1677       | 0.1681   | 0.1684   | 0.1707   | 0.1738          | 0.1726   | 0.0126   | 0.0156   |
| $b_6$                              | 0.0451       | 0.0494   | 0.0565   | 0.0729   | 0.0212          | 0.0287   | 0.0234   | 0.0270   |
| $b_7$                              | 0.0117       | 0.0132   | 0.0150   | 0.0154   | 0.0228          | 0.0244   | 0.0054   | 0.0040   |
| $b_8$                              | 0.0123       | 0.0189   | 0.0259   | 0.0320   | 0.0246          | 0.0286   | 0        | 0        |
| $b_9$                              | 0.0027       | 0.0032   | 0.0037   | 0.0028   | 0.0060          | 0.0060   | 0        | 0        |
| $f_m(300) = b_1 + b_4 + b_6 + b_8$ | 1.0065       | 1.0066   | 1.0093   | 1.0092   | 0.4918          | 0.4908   | 0.4887   | 0.4855   |

#### S4. SUPPORTING INFORMATION FOR SECTION 2.4.3

**S4.1. Derivation of eqn (20).** Equations (S1)–(S3) apply simultaneously.

$$\frac{dx_m(t)}{dt} = \frac{2}{\tau_m} (x_{out}(t) - x_m(t)) \quad (S1)$$

$$\frac{df_m(t)}{dt} = \frac{2}{\tau_m} (f(t) - f_m(t)) \quad (S2)$$

$$\frac{dP_{out}(t)}{dt} = \frac{1}{\tau_c} \times (P_0 f(t) - P_{out}(t)) - A_{np} U(t) \quad (S3)$$

Because  $x_{out}(t) = \frac{P_{out}(t)}{P_0}$  (eqn (7)), eqn (S3) can be rewritten as

$$U(t) = \frac{P_0}{A_{np}} \left( \frac{f(t) - x_{out}(t)}{\tau_c} - \frac{dx_{out}(t)}{dt} \right) \quad (S4)$$

Differentiating eqn (S1) with respect to  $t$  gives

$$\frac{dx_{out}(t)}{dt} = \frac{\tau_m}{2} \frac{d^2 x_m(t)}{dt^2} + \frac{dx_m(t)}{dt} \quad (S5)$$

Combining eqn (S1) and (S2) gives

$$f(t) - x_{out}(t) = f_m(t) - x_m(t) + \frac{\tau_m}{2} \left( \frac{df_m(t)}{dt} - \frac{dx_m(t)}{dt} \right) \quad (S6)$$

Substituting eqn (S5) and (S6) into eqn (S4) yields eqn (S7), that is, eqn (20).

$$U(t) = \frac{P_0}{A_{np}} \times \left( \frac{f_m(t) - x_m(t)}{\tau_c} - \frac{\tau_m}{2\tau_c} \frac{dx_m(t)}{dt} + \frac{\tau_m}{2\tau_c} \frac{df_m(t)}{dt} - \frac{\tau_m}{2} \frac{d^2 x_m(t)}{dt^2} - \frac{dx_m(t)}{dt} \right) \quad (S7)$$

## S5. SUPPORTING INFORMATION FOR SECTION 3.1

### S5.1. I<sub>2</sub> Loss Rates in Blank Experiments

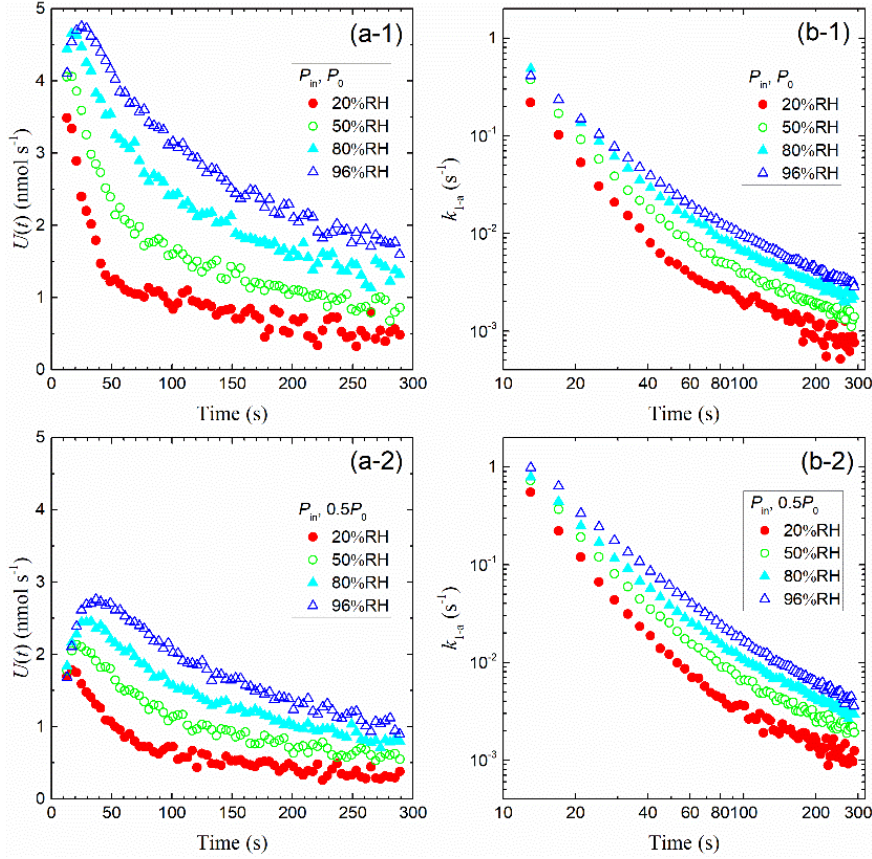

**Figure S4.** Time series of (a) loss rates of I<sub>2</sub> by uptake,  $U(t)$  (eqn (20)), and (b) their apparent first-order rate constants,  $k_{1-a}(t)$  (eqn (21)), at 20% RH, 50% RH, 80% RH, and 96% RH calculated from data (Figure 3) in blank experiments (1) with  $P_0$  as  $P_{in}$  and (2) with  $0.5P_0$  as  $P_{in}$ .

**S5.2. Freundlich-type and Langmuir-type Adsorption Equilibria.** Table S4 lists the parameters and the loss ratios determined by the simulation with eqn (12) and eqn (26)–(28) under the assumption of Freundlich-type adsorption equilibrium ( $N = 2$ ) of I<sub>2</sub> on the contactor wall.

When Langmuir-type adsorption of I<sub>2</sub> on the contactor wall was assumed, eqn (S8)–(S10) were used instead of eqn (26)–(28).

$$\frac{dx_{out}(t)}{dt} = \frac{1}{\tau_c} \times (f(t) - x_{out}(t)) - k_{bml} \times \left( x_{out}(t) - \frac{\theta_b(t)}{1 - \theta_b(t)} \frac{1}{K_{badsl}} \right) \quad (\text{S8})$$

$$\frac{d\theta_b(t)}{dt} = \frac{A_{pnl}}{q_{b\infty}} \left( x_{out}(t) - \frac{\theta_b(t)}{1 - \theta_b(t)} \frac{1}{K_{badsl}} \right) - k_{bfl}\theta_b(t) + k_{bbf}\varphi_b(t) \quad (\text{S9})$$

$$\frac{d\varphi_b(t)}{dt} = k_{bfl}\theta_b(t) - k_{bbf}\varphi_b(t) - k_{bbl}\varphi_b(t) \quad (\text{S10})$$

where  $k_{bml}$  is the mass-transfer coefficients of I<sub>2</sub> between the gas-phase and the wall surface;  $K_{badsl}$  is the adsorption equilibrium constant of I<sub>2</sub> on the wall surface;  $k_{bfl}$  and  $k_{bbf}$  are first-order forward and backward rate constants, respectively, for reversible transformation of adsorbents between surface and interior sites of the wall;  $k_{bbl}$  is the

first-order rate constant for loss of  $I_2$  in interior sites;  $q_{bt}$  and  $q_{b\infty}$  denote the amount of  $I_2$  adsorbed at time  $t$  and when the wall surface is fully saturated, respectively, and  $\theta_b(t)$  is the fractional coverage of the contactor wall surface, that is,  $q_{bt}/q_{b\infty}$ ;  $\varphi_b(t)$  is the number of interior sites into which  $I_2$  has been transformed as a fraction of  $q_{b\infty}$ ; and  $A_{pnl}$  is a conversion factor of units. Simulations using eqn (12) and eqn (S8)–(S10) were conducted to simultaneously reproduce time series of observed  $x_m(t)$  in both the cases of  $P_0$  and  $0.5P_0$  as  $P_{in}$  for four RH values with values of  $q_{b\infty}$ ,  $K_{badsI}$ ,  $k_{bfl}$ ,  $k_{bbI}$ , and  $k_{bll}$  as common parameters while the value of  $k_{bml}$  was assumed at  $0.5 \text{ s}^{-1}$ ; the results are listed in Table S5. This simulation yielded much larger RSS errors than those in Table S4.

**Table S4. Parameters Optimized to Reproduce the Time Series of  $x_m(t)$  in Blank Experiments with eqn (12) and eqn (26)–(28) and Freundlich-type Adsorption Equilibrium**

|                                                   | 20% RH                                         | 50% RH | 80% RH | 96% RH |      |
|---------------------------------------------------|------------------------------------------------|--------|--------|--------|------|
| $n$                                               | 2 (fixed)                                      |        |        |        |      |
| $k_{bml} \text{ (s}^{-1}\text{)}$                 | 0.6593 (This parameter is common at 20–96 %RH) |        |        |        |      |
| $K_{bads} \text{ (nmol atm}^{-0.5}\text{)}$       | 1.485                                          | 2.300  | 3.051  | 3.710  |      |
| $k_{bfl} \text{ (10}^{-3} \text{ s}^{-1}\text{)}$ | 5.128                                          | 6.993  | 8.594  | 9.727  |      |
| $k_{bb} \text{ (10}^{-3} \text{ s}^{-1}\text{)}$  | 2.335                                          | 3.698  | 4.773  | 4.593  |      |
| $k_{bfl} \text{ (10}^{-3} \text{ s}^{-1}\text{)}$ | 0.152                                          | 0.811  | 1.018  | 1.193  |      |
| loss ratio<br>(%)                                 | $P_{in} = P_0$                                 | 2.7    | 5.6    | 8.3    | 12.6 |
|                                                   | $P_{in} = 0.5P_0$                              | 2.2    | 6.5    | 10.2   | 15.6 |
| RSS                                               | 72.6                                           | 71.3   | 44.7   | 190.8  |      |

**Table S5. Parameters Optimized to Reproduce the Time Series of  $x_m(t)$  in Blank Experiments with eqn (12) and eqn (S8)–(S10) and Langmuir-type Adsorption Equilibrium**

|                                                   | 20% RH            | 50% RH | 80% RH | 96% RH |      |
|---------------------------------------------------|-------------------|--------|--------|--------|------|
| $k_{bml} \text{ (s}^{-1}\text{)}$                 | 0.5 (fixed)       |        |        |        |      |
| $q_{b\infty} \text{ (nmol)}$                      | 2.049             | 3.302  | 5.206  | 6.080  |      |
| $K_{badsI} \text{ (nmol atm}^{-1}\text{)}$        | 2.487             | 2.353  | 1.829  | 2.005  |      |
| $k_{bfl} \text{ (10}^{-3} \text{ s}^{-1}\text{)}$ | 3.994             | 4.614  | 4.870  | 6.111  |      |
| $k_{bbI} \text{ (10}^{-3} \text{ s}^{-1}\text{)}$ | 1.125             | 1.777  | 1.794  | 2.515  |      |
| $k_{bll} \text{ (10}^{-3} \text{ s}^{-1}\text{)}$ | 0.378             | 0.937  | 1.120  | 1.738  |      |
| loss ratio<br>(%)                                 | $P_{in} = P_0$    | 2.7    | 4.9    | 7.8    | 12.0 |
|                                                   | $P_{in} = 0.5P_0$ | 3.8    | 6.8    | 10.3   | 15.7 |
| RSS                                               | 251.2             | 273.2  | 354.5  | 675.5  |      |



## S6. SUPPORTING INFORMATION FOR SECTION 3.2

**S6.1. Estimated Dissociation Ratios in Relation R1 under Experimental Conditions.** Equation (29) is derived from reaction R1. Under the experimental conditions, water is in equilibrium with 400 ppmv CO<sub>2</sub> in I<sub>2</sub>-air(s) and thus has a pH of about 5.6 at 283 K. Literature values of  $K_a$  and  $K_H$  at 283 K are  $1.2 \times 10^{-13} \text{ M}^2$  and  $6.0 \text{ M atm}^{-1}$ ,<sup>3</sup> respectively. Substituting these values plus  $P_{I_2} = 3.2 \times 10^{-7} \text{ atm}$  and  $[\text{H}^+] = 10^{-5.6} \text{ M}$  into eqn (29) gives  $[\text{HOI}]/[\text{I}_2] = [\text{I}^-]/[\text{I}_2] = 0.16$ .

## S6.2. Apparent Surface Resistance for I<sub>2</sub> above Aqueous Surfaces.

**Table S6. Values of  $k_{1-a}$ ,  $k_{g-a}$ , and  $R_{g-a}$  for Runs 1 and 2 above Aqueous Solutions**

| sample              | $x_{\text{out}}(t)^a$    | $10^2 k_{1-a} (\text{s}^{-1})^a$ |                        |                           | $k_{g-a}$<br>( $\text{cm s}^{-1}$ ) | $R_{g-a}$<br>( $\text{s m}^{-1}$ ) |                                    |                                    |                            |
|---------------------|--------------------------|----------------------------------|------------------------|---------------------------|-------------------------------------|------------------------------------|------------------------------------|------------------------------------|----------------------------|
|                     |                          | From eqn (21)                    | After blank correction | $P_{\text{in}}$ for blank |                                     |                                    |                                    |                                    |                            |
| blank               | $P_{\text{in}} = P_0$    | $0.820 \pm 0.008$                | $0.32 \pm 0.02$        |                           |                                     |                                    |                                    |                                    |                            |
|                     | $P_{\text{in}} = 0.5P_0$ | $0.369 \pm 0.006$                | $0.42 \pm 0.04$        |                           |                                     |                                    |                                    |                                    |                            |
|                     | $S/S_c$                  | run no.                          |                        |                           |                                     |                                    |                                    |                                    |                            |
| 10 mM ascorbic acid | 0.138                    | 1                                | $0.471 \pm 0.002$      | $2.00 \pm 0.04$           | $1.67 \pm 0.05$<br>$1.58 \pm 0.06$  | $P_0$<br>$0.5P_0$                  | $0.91 \pm 0.03$<br>$0.86 \pm 0.03$ | $109 \pm 3$<br>$116 \pm 5$         |                            |
|                     |                          | 2                                | $0.489 \pm 0.003$      | $1.85 \pm 0.03$           | $1.53 \pm 0.03$<br>$1.43 \pm 0.05$  | $P_0$<br>$0.5P_0$                  | $0.83 \pm 0.02$<br>$0.78 \pm 0.03$ | $120 \pm 3$<br>$128 \pm 4$         |                            |
|                     | 0.461                    | 1                                | $0.243 \pm 0.003$      | $5.55 \pm 0.07$           | $5.22 \pm 0.07$<br>$5.13 \pm 0.08$  | $P_0$<br>$0.5P_0$                  | $0.85 \pm 0.01$<br>$0.83 \pm 0.01$ | $118 \pm 2$<br>$120 \pm 2$         |                            |
|                     |                          | 2                                | $0.246 \pm 0.003$      | $5.45 \pm 0.10$           | $5.12 \pm 0.10$<br>$5.03 \pm 0.10$  | $P_0$<br>$0.5P_0$                  | $0.83 \pm 0.02$<br>$0.82 \pm 0.02$ | $120 \pm 3$<br>$122 \pm 3$         |                            |
|                     | 1 mM ascorbic acid       | 0.138                            | 1                      | $0.475 \pm 0.003$         | $1.95 \pm 0.05$                     | $1.63 \pm 0.05$<br>$1.53 \pm 0.06$ | $P_0$<br>$0.5P_0$                  | $0.89 \pm 0.03$<br>$0.84 \pm 0.03$ | $113 \pm 3$<br>$120 \pm 5$ |
|                     |                          |                                  | 2                      | $0.487 \pm 0.002$         | $1.87 \pm 0.05$                     | $1.55 \pm 0.06$<br>$1.45 \pm 0.07$ | $P_0$<br>$0.5P_0$                  | $0.85 \pm 0.03$<br>$0.79 \pm 0.04$ | $118 \pm 4$<br>$126 \pm 6$ |
|                     |                          | 0.461                            | 1                      | $0.246 \pm 0.002$         | $5.45 \pm 0.06$                     | $5.13 \pm 0.06$<br>$5.03 \pm 0.07$ | $P_0$<br>$0.5P_0$                  | $0.83 \pm 0.01$<br>$0.82 \pm 0.01$ | $120 \pm 1$<br>$122 \pm 2$ |
|                     |                          |                                  | 2                      | $0.250 \pm 0.003$         | $5.33 \pm 0.10$                     | $5.00 \pm 0.10$<br>$4.91 \pm 0.11$ | $P_0$<br>$0.5P_0$                  | $0.81 \pm 0.02$<br>$0.80 \pm 0.02$ | $123 \pm 3$<br>$125 \pm 3$ |
| water               | 0.138                    | 1                                | $0.774 \pm 0.007$      | $0.46 \pm 0.03$           | $0.14 \pm 0.03$                     | $P_0$                              | $0.08 \pm 0.02$                    | $1300 \pm 300$                     |                            |
|                     |                          | 2                                | $0.778 \pm 0.020$      | $0.44 \pm 0.03$           | $0.12 \pm 0.04$                     | $P_0$                              | $0.06 \pm 0.02$                    | $1600 \pm 600$                     |                            |
|                     | 0.461                    | 1                                | $0.524 \pm 0.010$      | $1.49 \pm 0.05$           | $1.16 \pm 0.06$                     | $P_0$                              | $0.19 \pm 0.01$                    | $580 \pm 40$                       |                            |
|                     |                          | 2                                | $0.563 \pm 0.012$      | $1.22 \pm 0.06$           | $0.90 \pm 0.06$                     | $P_0$                              | $0.15 \pm 0.01$                    | $690 \pm 50$                       |                            |
| 1 mM sulfuric acid  | 0.138                    | 1                                | $0.774 \pm 0.009$      | $0.46 \pm 0.03$           | $0.12 \pm 0.04$                     | $P_0$                              | $0.07 \pm 0.02$                    | $1400 \pm 300$                     |                            |
|                     |                          | 2                                | $0.779 \pm 0.010$      | $0.42 \pm 0.04$           | $0.10 \pm 0.05$                     | $P_0$                              | $0.05 \pm 0.03$                    | $3400 \pm 2100$                    |                            |

<sup>a</sup> Each value is the average of 10 data points from 253–289 s.

## S6.3. Simulation of uptake of I<sub>2</sub> above Aqueous Ascorbic Acid.

Simulations were carried out to distinguish the uptake of I<sub>2</sub> by ascorbic acid and the contactor. Because the mass transfer in the gas-film layer is the rate-limiting step in I<sub>2</sub> uptake above aqueous ascorbic acid, on the basis of eqn (26) we assumed

$$\frac{dx_{\text{out}}(t)}{dt} = \frac{1}{\tau_c} \times (f(t) - x_{\text{out}}(t)) - \frac{S}{s_c h_c} k_m \times x_{\text{out}}(t) - k_{\text{bm}} \times \left\{ x_{\text{out}}(t) - \left( \frac{y_{\text{b}}(t)}{K_{\text{bads}}} \right)^2 \right\} \quad (\text{S11})$$

where  $k_m$  is the mass-transfer coefficient of  $\text{I}_2$  in the gas-film layer above ascorbic acid. Simulations using eqn (12), (27), (28), and (S11) were conducted to reproduce time series of  $x_m(t)$ . Although the simulation with the small basin successfully reproduced the time series of  $x_m(t)$  with  $k_m = 0.91 \text{ cm s}^{-1}$ , the simulation with the large basin never reproduced the data. We assumed additional Freundlich-type adsorption of  $\text{I}_2$  onto the contactor for the large-basin case and performed the simulation with

$$\begin{aligned} \frac{dx_{\text{out}}(t)}{dt} = & \frac{1}{\tau_c} \times (f(t) - x_{\text{out}}(t)) - \frac{S}{s_c h_c} k_m \times x_{\text{out}}(t) - k_{\text{bm}} \times \left\{ x_{\text{out}}(t) - \left( \frac{y_{\text{b}}(t)}{K_{\text{bads}}} \right)^2 \right\} \\ & - k_{\text{bma}} \times \left\{ x_{\text{out}}(t) - \left( \frac{y_{\text{ba}}(t)}{K_{\text{badsa}}} \right)^2 \right\} \end{aligned} \quad (\text{S12})$$

$$\frac{dy_{\text{ba}}(t)}{dt} = A_{\text{bpn}} k_{\text{bma}} \times \left\{ x_{\text{out}}(t) - \left( \frac{y_{\text{ba}}(t)}{K_{\text{badsa}}} \right)^2 \right\} \quad (\text{S13})$$

where  $k_{\text{bma}}$  is the mass-transfer coefficient of  $\text{I}_2$  for additional adsorption between gas and the contactor (determined as 0.0481),  $K_{\text{badsa}}$  is the corresponding parameter of Freundlich adsorption equilibrium (determined as 1.38), and  $y_{\text{ba}}(t)$  is the additional amount of  $\text{I}_2$  adsorbed onto the contactor. Figure 4 shows the obtained values of  $x_m(t)$  as solid curves. Values of  $k_m$  are thus estimated at  $0.91 \pm 0.01 \text{ cm s}^{-1}$  and  $0.78 \pm 0.01 \text{ cm s}^{-1}$  for the small and large basins, respectively (errors at 90% confidence level).

#### S6.4. Estimate of Uptake Coefficient ( $\gamma$ ) of $\text{I}_2$ on Ascorbic Acid. Values of $\gamma$ were derived from

$$\frac{1}{\gamma} = \frac{1}{\alpha} + \frac{v_m}{4HRT \sqrt{D_l k \left( \text{erf} \sqrt{kt} + \frac{e^{-kt}}{\sqrt{\pi kt}} \right)}} \quad (\text{S14})$$

where  $\alpha$  is the accommodation coefficient,  $v_m$  is the molecular velocity in  $\text{cm s}^{-1}$ ,  $H$  is the Henry's law constant in  $\text{M atm}^{-1}$  as obtained below,  $R$  is the gas constant ( $0.0821 \text{ M}^{-1} \text{ atm K}^{-1}$ ),  $T$  is the temperature in K,  $D_l$  is the diffusion constant in the liquid phase in  $\text{cm}^2 \text{ s}^{-1}$  as obtained below,  $k$  is the pseudo-first-order rate constant in the aqueous phase as obtained below, and  $t$  is the time during which gas is exposed to the aqueous surface.  $k$  is obtained by

$$k = k_{\text{R3}} [\text{ASC}] \quad (\text{S15})$$

where  $k_{\text{R3}}$  is a rate constant in  $\text{M}^{-1} \text{ s}^{-1}$  for reaction R3, and  $[\text{ASC}]$  is the aqueous concentration of ascorbic acid in M. Under the experimental conditions for 10 mM ascorbic acid ( $kt \gg 1$ ), eqn (S14) is approximated by

$$\frac{1}{\gamma} = \frac{1}{\alpha} + \frac{v_m}{4HRT \sqrt{D_l k_{\text{R3}} [\text{ASC}]}} \quad (\text{S16})$$

$HRT$  is obtained from<sup>4</sup>

$$\ln(HRT) = 2.8 \times \exp \left[ 4300 \times \left( \frac{1}{T} - \frac{1}{298.2} \right) \right] \quad (\text{S17})$$

and  $D_l$  is obtained from<sup>5</sup>

$$D_l = \frac{7.4 \times 10^{-8} (\phi M_B)^{1/2} T}{\eta_B V_A^{0.6}} \quad (\text{S18})$$

where  $\phi$  is the dimensionless association factor of water (2.6),  $M_B$  is the molecular weight of water (18 g mol<sup>-1</sup>),  $\eta_B$  is the viscosity of water (1.3064 cP at 283 K), and  $V_A$  is the molar volume of I<sub>2</sub> in cm<sup>3</sup> mol<sup>-1</sup> at its normal boiling temperature, estimated at 77 cm<sup>3</sup> mol<sup>-1</sup> by additive methods. Thus  $D_l$  is calculated to be  $8.09 \times 10^{-6}$  cm<sup>2</sup> s<sup>-1</sup> at 283 K. Substituting  $\alpha = 10^{-2}$ ,<sup>6</sup>  $v_m = 1.54 \times 10^4$ ,  $H = 6.0$ ,  $T = 283$ , and  $D_l = 8.09 \times 10^{-6}$  into eqn (S16) gives

$$\frac{1}{\gamma} = 100 + \frac{9710}{\sqrt{k_{R3}[\text{ASC}]}} \quad (\text{S19})$$

The value of  $k_{R3}$  reported at 293 K ( $1.2 \times 10^5$  M<sup>-1</sup> s<sup>-1</sup>)<sup>7</sup> is used to estimate  $\gamma$  by eqn (S19), yielding  $\gamma = 2.6 \times 10^{-3}$  for 10 mM ascorbic acid and  $1.0 \times 10^{-3}$  for 1 mM ascorbic acid. If there is no resistance against the gas-film transfer,  $\gamma$  values are related to  $k_m$  values by

$$k_m = \frac{1}{4} \gamma v_m \quad (\text{S20})$$

Because  $v_m$  is  $1.54 \times 10^4$  cm s<sup>-1</sup> at 283 K, the  $\gamma$  values of  $2.6 \times 10^{-3}$  and  $1.0 \times 10^{-3}$  would correspond to mass-transfer coefficients of 10.0 cm s<sup>-1</sup> and 3.9 cm s<sup>-1</sup>, that is, surface resistance of 10 s m<sup>-1</sup> and 26 s m<sup>-1</sup>, respectively, in the absence of gas-film transfer resistance.

## S7. SUPPORTING INFORMATION FOR SECTION 3.3

### S7.1. Time Series of I<sub>2</sub> in I<sub>2</sub>-air(s) Flowing over Clay Samples.

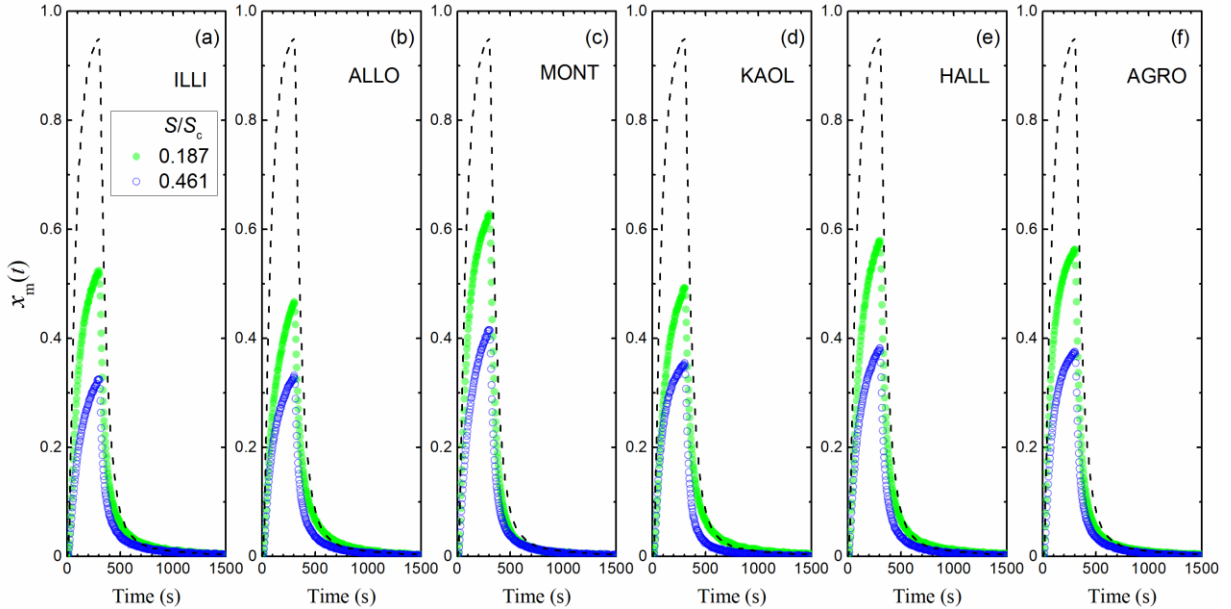

**Figure S5.** Time series of  $x_m(t)$  in I<sub>2</sub>-air(s) leaving the contactor ( $P_0, 4.0 \times 10^{-7}$  atm) at 20% RH after flowing over clay samples in run 1. Other experimental conditions were the same as those at 80% RH (Figure 6).

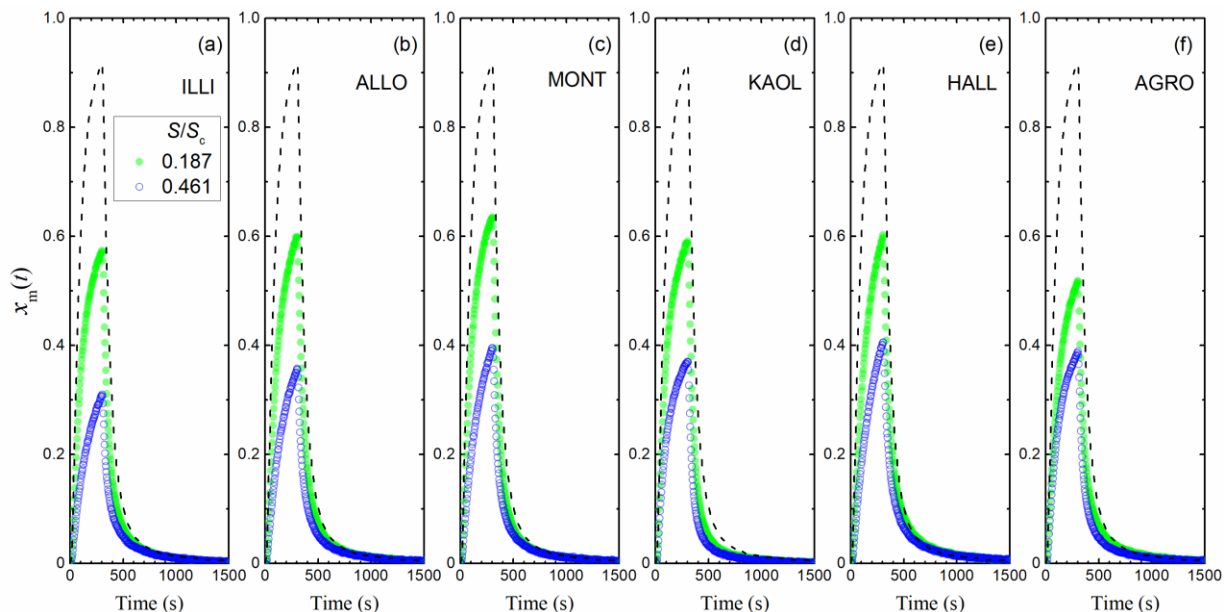

Figure S6. Same as Figure S5, for 50% RH.

### S7.2. Ratios of $\Delta Q_{\text{loss}}/Q_{\text{in}}$ and $\Delta Q_{\text{ads}}/Q_{\text{in}}$ in Different Runs at 20% RH, 50% RH, and 80% RH.

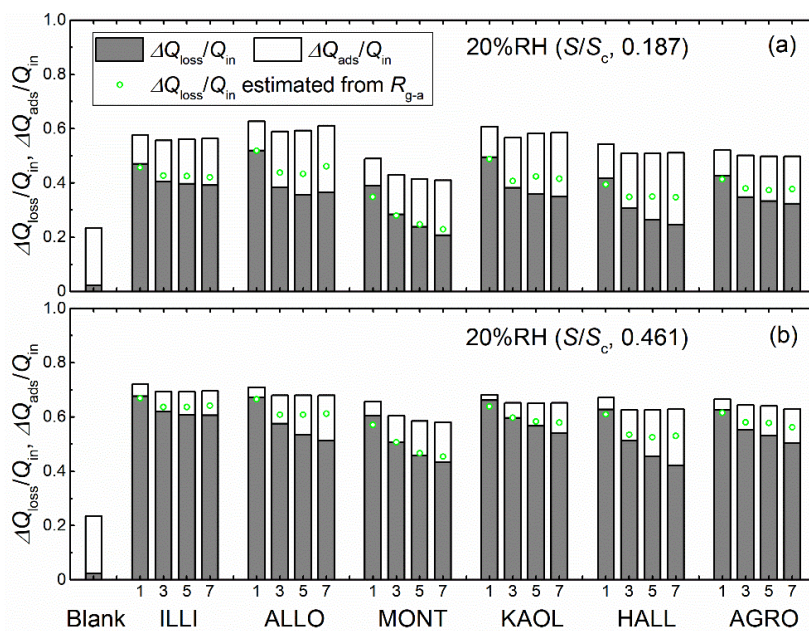

Figure S7. Ratios of  $\Delta Q_{\text{loss}}/Q_{\text{in}}$  and  $\Delta Q_{\text{ads}}/Q_{\text{in}}$  in odd-numbered runs ( $P_{\text{in}}, 4.0 \times 10^{-7}$  atm) for clay samples at 20% RH for experiments with (a) the small basin ( $S/S_c, 0.187$ ) and (b) the large basin ( $S/S_c, 0.461$ ). Green circle symbols represent  $\Delta Q_{\text{loss}}/Q_{\text{in}}$  estimated from  $R_{g-a}$  (Tables S8–S13) using eqn (S21). See the text (section S7.3) for explanation.

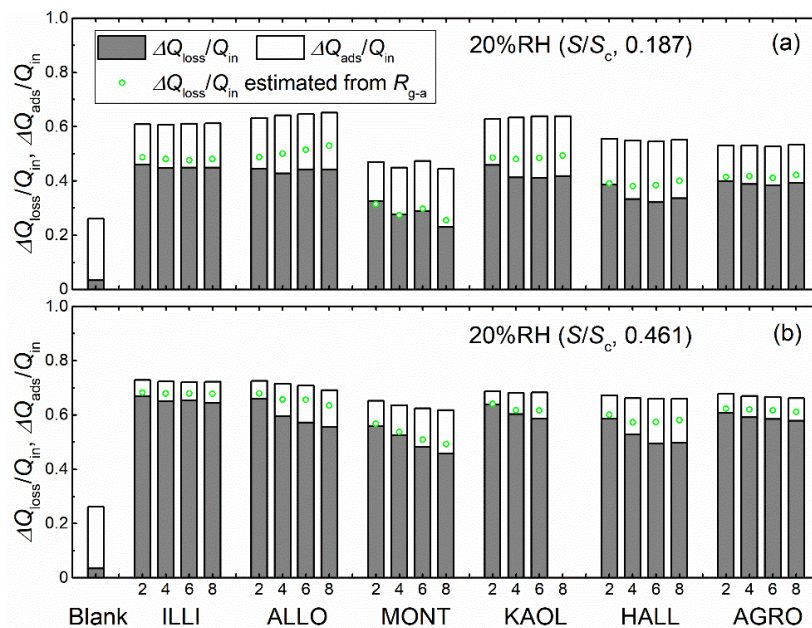

**Figure S8.** Same as Figure S7, but in even-numbered runs ( $P_{in}, 2.0 \times 10^{-7}$  atm) for 20% RH. Data for run 8 for kaolinite with the large basin are missing because  $I_2$ -air(s) was not introduced into the contactor.

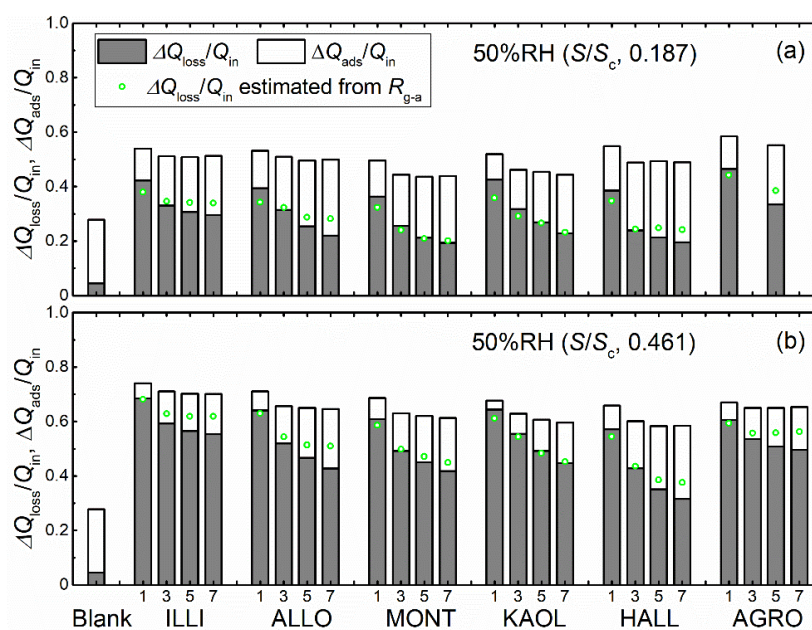

**Figure S9.** Same as Figure S7, but in odd-numbered runs ( $P_{in}, 4.0 \times 10^{-7}$  atm) for 50% RH. Data for run 3 and run 7 for AgromAT AG-1 with the small basin are missing because the baseline was changed during run 3 and because  $I_2$ -air(s) was not introduced into the contactor in run 7.

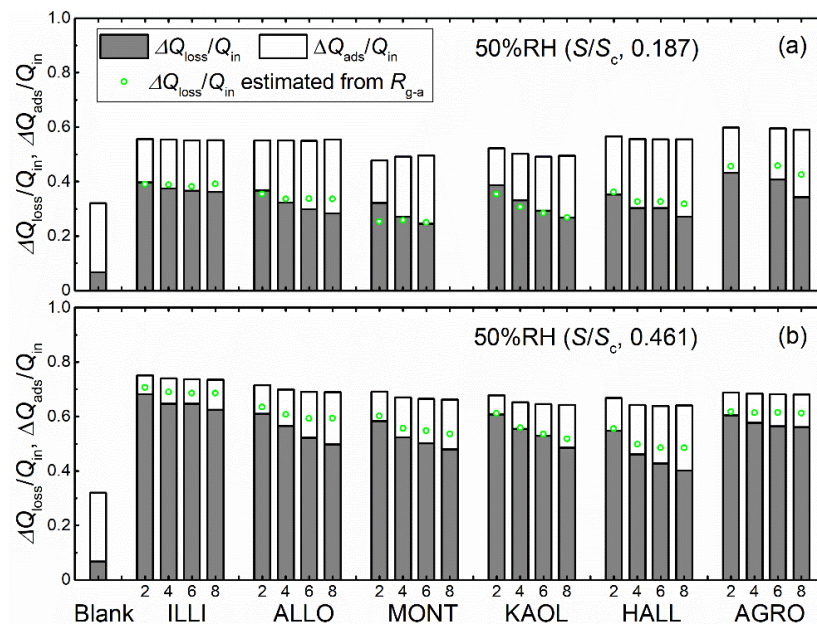

**Figure S10.** Same as Figure S7, but in even-numbered runs ( $P_{\text{in}}, 2.0 \times 10^{-7}$  atm) for 50% RH. Data for run 4 for AgroMAT AG-1 with the small basin are missing because the baseline was changed during the run.

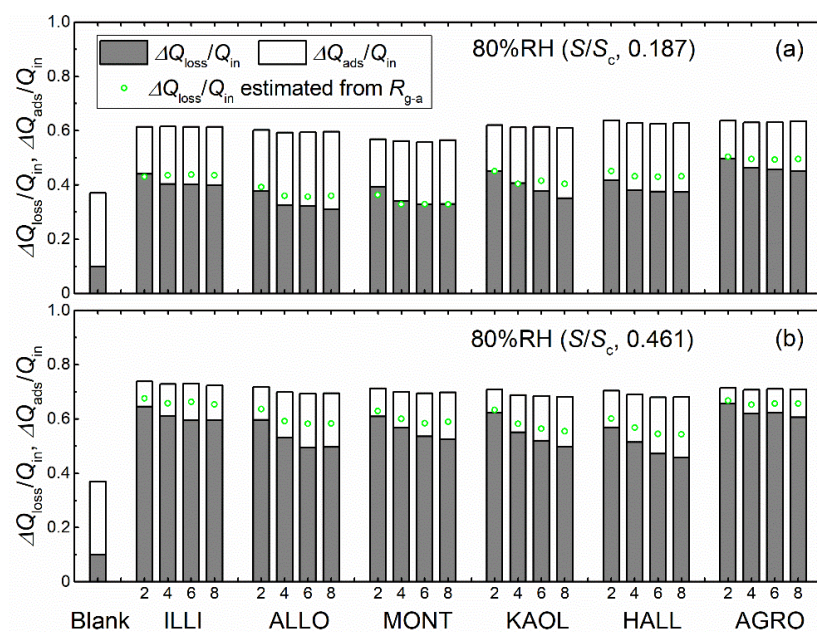

**Figure S11.** Same as Figure S7, but in even-numbered runs ( $P_{\text{in}}, 2.0 \times 10^{-7}$  atm) for 80% RH.

**S7.3. Apparent Surface Resistance for I<sub>2</sub> above Clay Samples.** We used a procedure analogous to our procedure for the aqueous solutions (section 3.2) to obtain the values of  $k_{1-a}$ ,  $k_{g-a}$ , and  $R_{g-a}$  from 10 values of  $k_{1-a}(t)$  at times of 253–289 s. Values of  $k_{1-a}$  in blank experiments in which values of  $P_0$  or  $0.5P_0$  were used as  $P_{in}$  at each value of RH (Table S7) were used to calculate  $k_{1-a}$  values for the clay samples (Tables S8–S13).

**Table S7. Values of  $k_{1-a}$  in Blank Experiments**

| RH | $P_{in}$ | $x_{out}(t)$ <sup>a</sup> | $10^2 k_{1-a} (s^{-1})$ <sup>a</sup> |
|----|----------|---------------------------|--------------------------------------|
| 20 | $P_0$    | 0.943                     | $0.08 \pm 0.02$                      |
|    | $0.5P_0$ | 0.450                     | $0.11 \pm 0.02$                      |
| 50 | $P_0$    | 0.904                     | $0.14 \pm 0.02$                      |
|    | $0.5P_0$ | 0.422                     | $0.22 \pm 0.02$                      |
| 80 | $P_0$    | 0.861                     | $0.23 \pm 0.02$                      |
|    | $0.5P_0$ | 0.396                     | $0.30 \pm 0.02$                      |

<sup>a</sup> Each value is the average of 10 data points from 253–289 s. Uncertainties ( $\pm$ ) are standard deviations.

As shown in Figure 10, uptake of I<sub>2</sub> decreased with time after about 50 s, although the gas-phase concentration of I<sub>2</sub> increased. Values of  $k_{1-a}(t)$  and  $k_{g-a}(t)$  decreased by an order of magnitude or more. The similarity of the decrease we observed for all clay samples suggested that there was a non-linear relationship between the I<sub>2</sub> uptake rates and gaseous concentrations of I<sub>2</sub>.

$R_{g-a}(t)$  increased with time during the injection period, but if surface resistance were a constant value equal to  $R_{gc}$ , then  $\Delta Q_{loss}/Q_{in}$  would be given by (see section S7.4)

$$\frac{\Delta Q_{loss}}{Q_{in}} = \frac{1}{1 + \frac{T_0 F_g}{T S} R_{gc}} \quad (S21)$$

Figure 9 and S7–S11 show the values of  $\Delta Q_{loss}/Q_{in}$  calculated with eqn (S21) and assuming  $R_{gc} = R_{g-a}$ . The calculated values agreed with the observed values within an error range of 30%, except for two runs (run 5 and run 7 for halloysite with the small basins at 20%RH). Values of  $R_{g-a}$  thus represent the surface resistance for I<sub>2</sub> above the clay samples.

**S7.4. Derivation of eqn (S21).** Let  $q_{out}(t)$  and  $q_{loss}(t)$  be rates for I<sub>2</sub> leaving the contactor and I<sub>2</sub> loss, respectively, at time  $t$ . Their ratios are given by

$$\frac{q_{loss}(t)}{q_{out}(t)} = \frac{S k_g(t)}{F_g \times \frac{T}{T_0}} = \frac{T_0 S}{T F_g} \frac{1}{R_g(t)} \quad (S22)$$

Because  $\Delta Q_{loss} = \int_0^{t_m} q_{loss}(t) dt$  where  $t_m$  was 1709 s, eqn (S22) was rewritten as

$$\Delta Q_{loss} = \frac{T_0 S}{T F_g} \int_0^{t_m} \frac{q_{out}(t)}{R_g(t)} dt \quad (S23)$$

The value of  $R_g(t)$  increased with time during the injection period, but if  $R_g(t)$  were a constant value equal to  $R_{gc}$ , eqn (S21) would be given from eqn (S23) and  $\int_0^{t_m} q_{out}(t) dt = Q_{out} = Q_{in} - \Delta Q_{loss}$ .

**Table S8. Values of  $k_{1-a}$ ,  $k_{g-a}$ , and  $R_{g-a}$  for Successive Runs with Illite Sample**

| RH (%) | $P_{in}$ | Run | $S/S_c$ | $x_{out}(t)^a$ | $10^2 k_{1-a} (s^{-1})^a$ |                        |                    | $k_{g-a}$<br>( $cm s^{-1}$ ) | $R_{g-a} (s m^{-1})$ |              |
|--------|----------|-----|---------|----------------|---------------------------|------------------------|--------------------|------------------------------|----------------------|--------------|
|        |          |     |         |                | From eqn (21)             | After blank correction | $P_{in}$ for blank |                              | value                | average      |
| 20     | $P_0$    | 1   | 0.187   | 0.514          | 1.629                     | 1.520                  | $0.5P_0$           | $0.61 \pm 0.02$              | $164 \pm 6$          | $166 \pm 4$  |
|        |          |     | 0.461   | 0.317          | 3.752                     | 3.643                  | $0.5P_0$           | $0.59 \pm 0.02$              | $169 \pm 5$          |              |
|        |          | 3   | 0.187   | 0.541          | 1.457                     | 1.349                  | $0.5P_0$           | $0.54 \pm 0.02$              | $185 \pm 8$          | $189 \pm 6$  |
|        |          |     | 0.461   | 0.348          | 3.284                     | 3.175                  | $0.5P_0$           | $0.52 \pm 0.01$              | $194 \pm 3$          |              |
|        |          | 5   | 0.187   | 0.542          | 1.445                     | 1.336                  | $0.5P_0$           | $0.54 \pm 0.02$              | $186 \pm 7$          | $190 \pm 5$  |
|        |          |     | 0.461   | 0.349          | 3.276                     | 3.167                  | $0.5P_0$           | $0.52 \pm 0.01$              | $194 \pm 4$          |              |
|        |          | 7   | 0.187   | 0.542          | 1.423                     | 1.314                  | $0.5P_0$           | $0.53 \pm 0.02$              | $189 \pm 7$          | $189 \pm 4$  |
|        |          |     | 0.461   | 0.344          | 3.357                     | 3.248                  | $0.5P_0$           | $0.53 \pm 0.01$              | $189 \pm 3$          |              |
|        | $0.5P_0$ | 2   | 0.187   | 0.237          | 1.824                     | 1.715                  | $0.5P_0$           | $0.69 \pm 0.04$              | $145 \pm 8$          | $152 \pm 8$  |
|        |          |     | 0.461   | 0.147          | 3.997                     | 3.888                  | $0.5P_0$           | $0.63 \pm 0.02$              | $158 \pm 4$          |              |
|        |          | 4   | 0.187   | 0.238          | 1.780                     | 1.672                  | $0.5P_0$           | $0.67 \pm 0.02$              | $149 \pm 5$          | $155 \pm 7$  |
|        |          |     | 0.461   | 0.150          | 3.944                     | 3.835                  | $0.5P_0$           | $0.62 \pm 0.02$              | $160 \pm 5$          |              |
|        |          | 6   | 0.187   | 0.238          | 1.758                     | 1.649                  | $0.5P_0$           | $0.66 \pm 0.03$              | $151 \pm 8$          | $156 \pm 7$  |
|        |          |     | 0.461   | 0.150          | 3.928                     | 3.819                  | $0.5P_0$           | $0.62 \pm 0.02$              | $161 \pm 6$          |              |
|        |          | 8   | 0.187   | 0.237          | 1.785                     | 1.676                  | $0.5P_0$           | $0.67 \pm 0.03$              | $149 \pm 7$          | $155 \pm 8$  |
|        |          |     | 0.461   | 0.150          | 3.918                     | 3.809                  | $0.5P_0$           | $0.62 \pm 0.02$              | $161 \pm 4$          |              |
| 50     | $P_0$    | 1   | 0.187   | 0.561          | 1.322                     | 1.103                  | $0.5P_0$           | $0.44 \pm 0.02$              | $226 \pm 11$         | $193 \pm 34$ |
|        |          |     | 0.461   | 0.297          | 4.075                     | 3.857                  | $0.5P_0$           | $0.63 \pm 0.02$              | $159 \pm 6$          |              |
|        |          | 3   | 0.187   | 0.602          | 1.094                     | 0.951                  | $P_0$              | $0.38 \pm 0.02$              | $262 \pm 11$         | $232 \pm 30$ |
|        |          |     | 0.461   | 0.343          | 3.259                     | 3.041                  | $0.5P_0$           | $0.49 \pm 0.01$              | $202 \pm 5$          |              |
|        |          | 5   | 0.187   | 0.604          | 1.075                     | 0.932                  | $P_0$              | $0.37 \pm 0.02$              | $267 \pm 13$         | $239 \pm 29$ |
|        |          |     | 0.461   | 0.351          | 3.144                     | 2.925                  | $0.5P_0$           | $0.48 \pm 0.02$              | $210 \pm 7$          |              |
|        |          | 7   | 0.187   | 0.605          | 1.069                     | 0.926                  | $P_0$              | $0.37 \pm 0.02$              | $269 \pm 15$         | $239 \pm 30$ |
|        |          |     | 0.461   | 0.352          | 3.145                     | 2.926                  | $0.5P_0$           | $0.48 \pm 0.01$              | $210 \pm 6$          |              |
|        | $0.5P_0$ | 2   | 0.187   | 0.267          | 1.370                     | 1.151                  | $0.5P_0$           | $0.46 \pm 0.02$              | $216 \pm 7$          | $179 \pm 38$ |
|        |          |     | 0.461   | 0.133          | 4.576                     | 4.357                  | $0.5P_0$           | $0.71 \pm 0.03$              | $141 \pm 6$          |              |
|        |          | 4   | 0.187   | 0.267          | 1.360                     | 1.141                  | $0.5P_0$           | $0.46 \pm 0.02$              | $218 \pm 8$          | $186 \pm 33$ |
|        |          |     | 0.461   | 0.140          | 4.229                     | 4.011                  | $0.5P_0$           | $0.65 \pm 0.03$              | $153 \pm 7$          |              |
|        |          | 6   | 0.187   | 0.268          | 1.333                     | 1.114                  | $0.5P_0$           | $0.45 \pm 0.03$              | $223 \pm 13$         | $190 \pm 34$ |
|        |          |     | 0.461   | 0.141          | 4.156                     | 3.938                  | $0.5P_0$           | $0.64 \pm 0.02$              | $156 \pm 5$          |              |
|        |          | 8   | 0.187   | 0.265          | 1.376                     | 1.157                  | $0.5P_0$           | $0.46 \pm 0.03$              | $215 \pm 13$         | $186 \pm 30$ |
|        |          |     | 0.461   | 0.143          | 4.142                     | 3.923                  | $0.5P_0$           | $0.64 \pm 0.02$              | $157 \pm 6$          |              |
| 80     | $P_0$    | 1   | 0.187   | 0.533          | 1.460                     | 1.156                  | $0.5P_0$           | $0.46 \pm 0.02$              | $215 \pm 10$         | $202 \pm 14$ |
|        |          |     | 0.461   | 0.326          | 3.548                     | 3.243                  | $0.5P_0$           | $0.53 \pm 0.02$              | $190 \pm 7$          |              |
|        |          | 3   | 0.187   | 0.558          | 1.297                     | 0.993                  | $0.5P_0$           | $0.40 \pm 0.03$              | $251 \pm 17$         | $259 \pm 23$ |
|        |          |     | 0.461   | 0.372          | 2.872                     | 2.568                  | $0.5P_0$           | $0.42 \pm 0.02$              | $239 \pm 9$          |              |
|        |          | 5   | 0.187   | 0.579          | 1.185                     | 0.880                  | $0.5P_0$           | $0.35 \pm 0.02$              | $283 \pm 14$         | $264 \pm 20$ |
|        |          |     | 0.461   | 0.377          | 2.803                     | 2.499                  | $0.5P_0$           | $0.41 \pm 0.02$              | $246 \pm 10$         |              |
|        |          | 7   | 0.187   | 0.576          | 1.200                     | 0.895                  | $0.5P_0$           | $0.36 \pm 0.03$              | $278 \pm 22$         | $273 \pm 13$ |
|        |          |     | 0.461   | 0.393          | 2.602                     | 2.298                  | $0.5P_0$           | $0.37 \pm 0.01$              | $268 \pm 9$          |              |
|        | $0.5P_0$ | 2   | 0.187   | 0.239          | 1.671                     | 1.367                  | $0.5P_0$           | $0.55 \pm 0.03$              | $182 \pm 10$         | $173 \pm 11$ |
|        |          |     | 0.461   | 0.143          | 4.073                     | 3.769                  | $0.5P_0$           | $0.61 \pm 0.02$              | $163 \pm 6$          |              |
|        |          | 4   | 0.187   | 0.238          | 1.680                     | 1.375                  | $0.5P_0$           | $0.55 \pm 0.04$              | $181 \pm 14$         | $178 \pm 6$  |
|        |          |     | 0.461   | 0.150          | 3.785                     | 3.481                  | $0.5P_0$           | $0.57 \pm 0.03$              | $177 \pm 9$          |              |
|        |          | 6   | 0.187   | 0.237          | 1.712                     | 1.408                  | $0.5P_0$           | $0.57 \pm 0.02$              | $177 \pm 7$          | $175 \pm 5$  |
|        |          |     | 0.461   | 0.148          | 3.860                     | 3.556                  | $0.5P_0$           | $0.58 \pm 0.02$              | $173 \pm 7$          |              |
|        |          | 8   | 0.187   | 0.237          | 1.698                     | 1.393                  | $0.5P_0$           | $0.56 \pm 0.02$              | $179 \pm 7$          | $180 \pm 6$  |
|        |          |     | 0.461   | 0.153          | 3.713                     | 3.408                  | $0.5P_0$           | $0.55 \pm 0.03$              | $180 \pm 9$          |              |

<sup>a</sup> Each value is the average of 10 data points from 253–289 s. Errors are standard deviations.



Table S9. Values of  $k_{1-a}$ ,  $k_{g-a}$ , and  $R_{g-a}$  for Successive Runs with Allophane Sample

| RH (%) | $P_{in}$ | Run | $S/S_c$ | $x_{out}(t)^a$ | $10^2 k_{1-a} (s^{-1})^a$ |                        |                    | $k_{g-a}$<br>( $cm s^{-1}$ ) | $R_{g-a} (s m^{-1})$ |              |
|--------|----------|-----|---------|----------------|---------------------------|------------------------|--------------------|------------------------------|----------------------|--------------|
|        |          |     |         |                | From eqn (21)             | After blank correction | $P_{in}$ for blank |                              | value                | average      |
| 20     | $P_0$    | 1   | 0.187   | 0.452          | 2.062                     | 1.954                  | $0.5P_0$           | $0.78 \pm 0.03$              | $127 \pm 4$          | $149 \pm 22$ |
|        |          |     | 0.461   | 0.321          | 3.703                     | 3.594                  | $0.5P_0$           | $0.58 \pm 0.01$              | $171 \pm 4$          |              |
|        |          | 3   | 0.187   | 0.523          | 1.520                     | 1.411                  | $0.5P_0$           | $0.57 \pm 0.03$              | $176 \pm 9$          | $198 \pm 22$ |
|        |          |     | 0.461   | 0.372          | 2.919                     | 2.810                  | $0.5P_0$           | $0.46 \pm 0.01$              | $219 \pm 6$          |              |
|        |          | 5   | 0.187   | 0.526          | 1.493                     | 1.384                  | $0.5P_0$           | $0.57 \pm 0.02$              | $180 \pm 8$          | $199 \pm 20$ |
|        |          |     | 0.461   | 0.372          | 2.921                     | 2.813                  | $0.5P_0$           | $0.46 \pm 0.01$              | $219 \pm 6$          |              |
|        |          | 7   | 0.187   | 0.502          | 1.658                     | 1.549                  | $0.5P_0$           | $0.62 \pm 0.03$              | $161 \pm 7$          | $188 \pm 28$ |
|        |          |     | 0.461   | 0.370          | 2.966                     | 2.857                  | $0.5P_0$           | $0.46 \pm 0.01$              | $215 \pm 5$          |              |
|        | $0.5P_0$ | 2   | 0.187   | 0.231          | 1.836                     | 1.727                  | $0.5P_0$           | $0.69 \pm 0.03$              | $144 \pm 6$          | $153 \pm 10$ |
|        |          |     | 0.461   | 0.149          | 3.928                     | 3.819                  | $0.5P_0$           | $0.62 \pm 0.03$              | $161 \pm 7$          |              |
|        |          | 4   | 0.187   | 0.225          | 1.920                     | 1.812                  | $0.5P_0$           | $0.73 \pm 0.04$              | $137 \pm 7$          | $157 \pm 21$ |
|        |          |     | 0.461   | 0.159          | 3.572                     | 3.463                  | $0.5P_0$           | $0.56 \pm 0.02$              | $178 \pm 7$          |              |
|        |          | 6   | 0.187   | 0.220          | 2.026                     | 1.918                  | $0.5P_0$           | $0.77 \pm 0.03$              | $130 \pm 5$          | $154 \pm 25$ |
|        |          |     | 0.461   | 0.160          | 3.550                     | 3.441                  | $0.5P_0$           | $0.56 \pm 0.02$              | $179 \pm 5$          |              |
|        |          | 8   | 0.187   | 0.214          | 2.142                     | 2.033                  | $0.5P_0$           | $0.82 \pm 0.03$              | $122 \pm 4$          | $159 \pm 37$ |
|        |          |     | 0.461   | 0.169          | 3.255                     | 3.146                  | $0.5P_0$           | $0.51 \pm 0.01$              | $195 \pm 6$          |              |
| 50     | $P_0$    | 1   | 0.187   | 0.585          | 1.158                     | 0.939                  | $0.5P_0$           | $0.38 \pm 0.02$              | $265 \pm 13$         | $233 \pm 33$ |
|        |          |     | 0.461   | 0.342          | 3.280                     | 3.061                  | $0.5P_0$           | $0.51 \pm 0.02$              | $201 \pm 7$          |              |
|        |          | 3   | 0.187   | 0.620          | 1.003                     | 0.860                  | $P_0$              | $0.35 \pm 0.03$              | $289 \pm 23$         | $288 \pm 12$ |
|        |          |     | 0.461   | 0.420          | 2.361                     | 2.142                  | $0.5P_0$           | $0.35 \pm 0.01$              | $287 \pm 9$          |              |
|        |          | 5   | 0.187   | 0.648          | 0.870                     | 0.728                  | $P_0$              | $0.29 \pm 0.02$              | $342 \pm 18$         | $332 \pm 16$ |
|        |          |     | 0.461   | 0.438          | 2.123                     | 1.905                  | $0.5P_0$           | $0.31 \pm 0.02$              | $323 \pm 16$         |              |
|        |          | 7   | 0.187   | 0.651          | 0.852                     | 0.709                  | $P_0$              | $0.28 \pm 0.02$              | $351 \pm 24$         | $340 \pm 18$ |
|        |          |     | 0.461   | 0.443          | 2.088                     | 1.869                  | $0.5P_0$           | $0.30 \pm 0.01$              | $329 \pm 14$         |              |
|        | $0.5P_0$ | 2   | 0.187   | 0.279          | 1.206                     | 0.987                  | $0.5P_0$           | $0.40 \pm 0.02$              | $252 \pm 11$         | $224 \pm 29$ |
|        |          |     | 0.461   | 0.163          | 3.353                     | 3.134                  | $0.5P_0$           | $0.51 \pm 0.03$              | $196 \pm 10$         |              |
|        |          | 4   | 0.187   | 0.284          | 1.131                     | 0.913                  | $0.5P_0$           | $0.37 \pm 0.02$              | $273 \pm 18$         | $247 \pm 28$ |
|        |          |     | 0.461   | 0.175          | 2.997                     | 2.778                  | $0.5P_0$           | $0.45 \pm 0.02$              | $221 \pm 9$          |              |
|        |          | 6   | 0.187   | 0.284          | 1.136                     | 0.917                  | $0.5P_0$           | $0.37 \pm 0.03$              | $271 \pm 19$         | $253 \pm 21$ |
|        |          |     | 0.461   | 0.181          | 2.836                     | 2.618                  | $0.5P_0$           | $0.43 \pm 0.02$              | $235 \pm 9$          |              |
|        |          | 8   | 0.187   | 0.284          | 1.129                     | 0.911                  | $0.5P_0$           | $0.37 \pm 0.03$              | $273 \pm 25$         | $254 \pm 24$ |
|        |          |     | 0.461   | 0.181          | 2.841                     | 2.622                  | $0.5P_0$           | $0.43 \pm 0.02$              | $234 \pm 10$         |              |
| 80     | $P_0$    | 1   | 0.187   | 0.565          | 1.247                     | 0.943                  | $0.5P_0$           | $0.38 \pm 0.03$              | $264 \pm 18$         | $242 \pm 24$ |
|        |          |     | 0.461   | 0.353          | 3.096                     | 2.792                  | $0.5P_0$           | $0.45 \pm 0.02$              | $220 \pm 9$          |              |
|        |          | 3   | 0.187   | 0.624          | 0.948                     | 0.716                  | $P_0$              | $0.29 \pm 0.03$              | $347 \pm 31$         | $354 \pm 34$ |
|        |          |     | 0.461   | 0.432          | 2.183                     | 1.879                  | $0.5P_0$           | $0.31 \pm 0.02$              | $327 \pm 16$         |              |
|        |          | 5   | 0.187   | 0.639          | 0.860                     | 0.628                  | $P_0$              | $0.25 \pm 0.02$              | $396 \pm 38$         | $385 \pm 25$ |
|        |          |     | 0.461   | 0.454          | 1.953                     | 1.649                  | $0.5P_0$           | $0.27 \pm 0.02$              | $373 \pm 24$         |              |
|        |          | 7   | 0.187   | 0.632          | 0.886                     | 0.654                  | $P_0$              | $0.26 \pm 0.03$              | $381 \pm 38$         | $380 \pm 22$ |
|        |          |     | 0.461   | 0.457          | 1.923                     | 1.618                  | $0.5P_0$           | $0.26 \pm 0.02$              | $380 \pm 22$         |              |
|        | $0.5P_0$ | 2   | 0.187   | 0.251          | 1.472                     | 1.167                  | $0.5P_0$           | $0.47 \pm 0.04$              | $213 \pm 10$         | $204 \pm 14$ |
|        |          |     | 0.461   | 0.159          | 3.477                     | 3.172                  | $0.5P_0$           | $0.52 \pm 0.02$              | $194 \pm 9$          |              |
|        |          | 4   | 0.187   | 0.265          | 1.248                     | 0.943                  | $0.5P_0$           | $0.38 \pm 0.03$              | $264 \pm 23$         | $240 \pm 13$ |
|        |          |     | 0.461   | 0.175          | 2.918                     | 2.614                  | $0.5P_0$           | $0.43 \pm 0.02$              | $235 \pm 8$          |              |
|        |          | 6   | 0.187   | 0.262          | 1.305                     | 1.001                  | $0.5P_0$           | $0.40 \pm 0.04$              | $249 \pm 28$         | $246 \pm 15$ |
|        |          |     | 0.461   | 0.179          | 2.824                     | 2.520                  | $0.5P_0$           | $0.41 \pm 0.02$              | $244 \pm 10$         |              |
|        |          | 8   | 0.187   | 0.260          | 1.319                     | 1.015                  | $0.5P_0$           | $0.41 \pm 0.04$              | $245 \pm 22$         | $244 \pm 12$ |
|        |          |     | 0.461   | 0.179          | 2.834                     | 2.530                  | $0.5P_0$           | $0.41 \pm 0.02$              | $243 \pm 10$         |              |

<sup>a</sup> Each value is the average of 10 data points from 253–289 s. Errors are standard deviations.

**Table S10. Values of  $k_{1-a}$ ,  $k_{g-a}$ , and  $R_{g-a}$  for Successive Runs with Montmorillonite Sample**

| RH (%) | $P_{in}$ | Run   | $S/S_c$ | $x_{out}(t)^a$ | $10^2 k_{1-a} (s^{-1})^a$ |                        |                    | $k_{g-a}$<br>( $cm s^{-1}$ ) | $R_{g-a} (s m^{-1})$ |              |              |
|--------|----------|-------|---------|----------------|---------------------------|------------------------|--------------------|------------------------------|----------------------|--------------|--------------|
|        |          |       |         |                | From eqn (21)             | After blank correction | $P_{in}$ for blank |                              | value                | average      |              |
| 20     | $P_0$    | 1     | 0.187   | 0.614          | 1.047                     | 0.967                  | $P_0$              | $0.39 \pm 0.02$              | $257 \pm 13$         | $256 \pm 9$  |              |
|        |          |       | 0.461   | 0.405          | 2.516                     | 2.408                  | $0.5P_0$           | $0.39 \pm 0.02$              | $255 \pm 10$         |              |              |
|        |          | 3     | 0.187   | 0.685          | 0.781                     | 0.701                  | $P_0$              | $0.28 \pm 0.02$              | $355 \pm 20$         |              | $343 \pm 16$ |
|        |          |       | 0.461   | 0.468          | 1.964                     | 1.856                  | $0.5P_0$           | $0.30 \pm 0.01$              | $331 \pm 7$          |              |              |
|        |          | 5     | 0.187   | 0.712          | 0.675                     | 0.595                  | $P_0$              | $0.24 \pm 0.01$              | $418 \pm 25$         |              | $404 \pm 22$ |
|        |          |       | 0.461   | 0.501          | 1.689                     | 1.581                  | $0.5P_0$           | $0.26 \pm 0.01$              | $389 \pm 20$         |              |              |
|        |          | 7     | 0.187   | 0.728          | 0.619                     | 0.539                  | $P_0$              | $0.22 \pm 0.02$              | $462 \pm 38$         |              | $435 \pm 33$ |
|        |          |       | 0.461   | 0.513          | 1.614                     | 1.505                  | $0.5P_0$           | $0.24 \pm 0.01$              | $409 \pm 14$         |              |              |
|        | $0.5P_0$ | 2     | 0.187   | 0.314          | 0.940                     | 0.832                  | $0.5P_0$           | $0.33 \pm 0.02$              | $299 \pm 15$         | $279 \pm 22$ |              |
|        |          |       | 0.461   | 0.200          | 2.486                     | 2.377                  | $0.5P_0$           | $0.39 \pm 0.01$              | $259 \pm 9$          |              |              |
|        |          | 4     | 0.187   | 0.331          | 0.792                     | 0.683                  | $0.5P_0$           | $0.27 \pm 0.02$              | $364 \pm 29$         | $328 \pm 39$ |              |
|        |          |       | 0.461   | 0.213          | 2.212                     | 2.103                  | $0.5P_0$           | $0.34 \pm 0.01$              | $292 \pm 11$         |              |              |
|        |          | 6     | 0.187   | 0.320          | 0.874                     | 0.766                  | $0.5P_0$           | $0.31 \pm 0.02$              | $325 \pm 17$         | $327 \pm 11$ |              |
|        |          |       | 0.461   | 0.224          | 1.981                     | 1.872                  | $0.5P_0$           | $0.30 \pm 0.01$              | $328 \pm 14$         |              |              |
|        |          | 8     | 0.187   | 0.338          | 0.726                     | 0.617                  | $0.5P_0$           | $0.25 \pm 0.02$              | $403 \pm 36$         | $377 \pm 34$ |              |
|        |          |       | 0.461   | 0.230          | 1.866                     | 1.757                  | $0.5P_0$           | $0.29 \pm 0.02$              | $350 \pm 19$         |              |              |
| 50     | $P_0$    | 1     | 0.187   | 0.622          | 1.005                     | 0.863                  | $P_0$              | $0.35 \pm 0.01$              | $289 \pm 12$         | $265 \pm 25$ |              |
|        |          |       | 0.461   | 0.379          | 2.764                     | 2.545                  | $0.5P_0$           | $0.41 \pm 0.02$              | $242 \pm 10$         |              |              |
|        |          | 3     | 0.187   | 0.693          | 0.716                     | 0.573                  | $P_0$              | $0.23 \pm 0.02$              | $434 \pm 37$         |              | $389 \pm 49$ |
|        |          |       | 0.461   | 0.458          | 2.005                     | 1.786                  | $0.5P_0$           | $0.29 \pm 0.01$              | $344 \pm 11$         |              |              |
|        |          | 5     | 0.187   | 0.717          | 0.620                     | 0.477                  | $P_0$              | $0.19 \pm 0.02$              | $522 \pm 47$         |              | $452 \pm 74$ |
|        |          |       | 0.461   | 0.478          | 1.826                     | 1.607                  | $0.5P_0$           | $0.26 \pm 0.01$              | $382 \pm 12$         |              |              |
|        |          | 7     | 0.187   | 0.718          | 0.598                     | 0.455                  | $P_0$              | $0.18 \pm 0.02$              | $547 \pm 54$         |              | $483 \pm 71$ |
|        |          |       | 0.461   | 0.490          | 1.686                     | 1.468                  | $0.5P_0$           | $0.24 \pm 0.01$              | $419 \pm 23$         |              |              |
|        | $0.5P_0$ | 2     | 0.187   | 0.320          | 0.829                     | 0.610                  | $0.5P_0$           | $0.25 \pm 0.02$              | $408 \pm 39$         | $317 \pm 93$ |              |
|        |          |       | 0.461   | 0.179          | 2.937                     | 2.718                  | $0.5P_0$           | $0.44 \pm 0.02$              | $226 \pm 12$         |              |              |
|        |          | 4     | 0.187   | 0.317          | 0.843                     | 0.624                  | $0.5P_0$           | $0.25 \pm 0.02$              | $399 \pm 40$         | $336 \pm 39$ |              |
|        |          |       | 0.461   | 0.197          | 2.475                     | 2.257                  | $0.5P_0$           | $0.37 \pm 0.01$              | $272 \pm 9$          |              |              |
|        |          | 6     | 0.187   | 0.319          | 0.822                     | 0.603                  | $0.5P_0$           | $0.24 \pm 0.02$              | $413 \pm 36$         | $347 \pm 68$ |              |
|        |          |       | 0.461   | 0.199          | 2.400                     | 2.181                  | $0.5P_0$           | $0.35 \pm 0.02$              | $282 \pm 16$         |              |              |
|        |          | 8     | 0.187   | no data        |                           |                        |                    |                              |                      |              |              |
|        |          | 0.461 | 0.204   | 2.303          | 2.085                     | $0.5P_0$               | $0.34 \pm 0.02$    | $295 \pm 17$                 |                      |              |              |
| 80     | $P_0$    | 1     | 0.187   | 0.580          | 1.190                     | 0.886                  | $0.5P_0$           | $0.36 \pm 0.02$              | $281 \pm 14$         | $254 \pm 28$ |              |
|        |          |       | 0.461   | 0.360          | 3.017                     | 2.713                  | $0.5P_0$           | $0.44 \pm 0.01$              | $227 \pm 6$          |              |              |
|        |          | 3     | 0.187   | 0.633          | 0.938                     | 0.706                  | $P_0$              | $0.28 \pm 0.02$              | $352 \pm 21$         |              | $344 \pm 46$ |
|        |          |       | 0.461   | 0.421          | 2.343                     | 2.038                  | $0.5P_0$           | $0.33 \pm 0.01$              | $302 \pm 12$         |              |              |
|        |          | 5     | 0.187   | 0.642          | 0.887                     | 0.656                  | $P_0$              | $0.26 \pm 0.02$              | $380 \pm 25$         |              | $366 \pm 20$ |
|        |          |       | 0.461   | 0.449          | 2.047                     | 1.743                  | $0.5P_0$           | $0.28 \pm 0.01$              | $353 \pm 16$         |              |              |
|        |          | 7     | 0.187   | 0.648          | 0.876                     | 0.645                  | $P_0$              | $0.26 \pm 0.02$              | $386 \pm 36$         |              | $374 \pm 23$ |
|        |          |       | 0.461   | 0.453          | 2.002                     | 1.697                  | $0.5P_0$           | $0.28 \pm 0.01$              | $362 \pm 18$         |              |              |
|        | $0.5P_0$ | 2     | 0.187   | 0.266          | 1.332                     | 1.028                  | $0.5P_0$           | $0.41 \pm 0.03$              | $242 \pm 19$         | $221 \pm 23$ |              |
|        |          |       | 0.461   | 0.162          | 3.370                     | 3.065                  | $0.5P_0$           | $0.50 \pm 0.02$              | $201 \pm 8$          |              |              |
|        |          | 4     | 0.187   | 0.276          | 1.209                     | 0.905                  | $0.5P_0$           | $0.36 \pm 0.03$              | $275 \pm 23$         | $255 \pm 32$ |              |
|        |          |       | 0.461   | 0.172          | 3.015                     | 2.711                  | $0.5P_0$           | $0.44 \pm 0.03$              | $227 \pm 13$         |              |              |
|        |          | 6     | 0.187   | 0.278          | 1.192                     | 0.888                  | $0.5P_0$           | $0.36 \pm 0.03$              | $280 \pm 24$         | $261 \pm 24$ |              |
|        |          |       | 0.461   | 0.179          | 2.839                     | 2.534                  | $0.5P_0$           | $0.41 \pm 0.03$              | $243 \pm 18$         |              |              |
|        |          | 8     | 0.187   | 0.275          | 1.186                     | 0.882                  | $0.5P_0$           | $0.35 \pm 0.03$              | $282 \pm 31$         | $260 \pm 28$ |              |
|        |          |       | 0.461   | 0.177          | 2.894                     | 2.590                  | $0.5P_0$           | $0.42 \pm 0.02$              | $237 \pm 13$         |              |              |

<sup>a</sup> Each value is the average of 10 data points from 253–289 s. Errors are standard deviations.

**Table S11. Values of  $k_{1-a}$ ,  $k_{g-a}$ , and  $R_{g-a}$  for Successive Runs with Kaolinite Sample**

| RH (%) | $P_{in}$ | Run | $S/S_c$ | $x_{out}(t)^a$ | $10^2 k_{1-a} (s^{-1})^a$ |                        |                    | $k_{g-a}$<br>( $cm s^{-1}$ ) | $R_{g-a} (s m^{-1})$ |              |              |
|--------|----------|-----|---------|----------------|---------------------------|------------------------|--------------------|------------------------------|----------------------|--------------|--------------|
|        |          |     |         |                | From eqn (21)             | After blank correction | $P_{in}$ for blank |                              | value                | average      |              |
| 20     | $P_0$    | 1   | 0.187   | 0.480          | 1.833                     | 1.724                  | $0.5P_0$           | $0.69 \pm 0.03$              | $144 \pm 7$          | $168 \pm 24$ |              |
|        |          |     | 0.461   | 0.348          | 3.303                     | 3.194                  | $0.5P_0$           | $0.52 \pm 0.01$              | $192 \pm 3$          |              |              |
|        |          | 3   | 0.187   | 0.556          | 1.352                     | 1.243                  | $0.5P_0$           | $0.50 \pm 0.02$              | $200 \pm 8$          |              | $215 \pm 15$ |
|        |          |     | 0.461   | 0.387          | 2.793                     | 2.685                  | $0.5P_0$           | $0.44 \pm 0.01$              | $229 \pm 5$          |              |              |
|        |          | 5   | 0.187   | 0.541          | 1.438                     | 1.330                  | $0.5P_0$           | $0.53 \pm 0.02$              | $187 \pm 6$          |              | $215 \pm 28$ |
|        |          |     | 0.461   | 0.398          | 2.644                     | 2.536                  | $0.5P_0$           | $0.41 \pm 0.01$              | $242 \pm 6$          |              |              |
|        |          | 7   | 0.187   | 0.542          | 1.394                     | 1.285                  | $0.5P_0$           | $0.52 \pm 0.01$              | $194 \pm 5$          |              | $220 \pm 27$ |
|        |          |     | 0.461   | 0.400          | 2.598                     | 2.490                  | $0.5P_0$           | $0.40 \pm 0.01$              | $247 \pm 7$          |              |              |
|        | $0.5P_0$ | 2   | 0.187   | 0.233          | 1.820                     | 1.712                  | $0.5P_0$           | $0.69 \pm 0.05$              | $145 \pm 10$         | $168 \pm 23$ |              |
|        |          |     | 0.461   | 0.168          | 3.333                     | 3.224                  | $0.5P_0$           | $0.52 \pm 0.01$              | $191 \pm 4$          |              |              |
|        |          | 4   | 0.187   | 0.235          | 1.783                     | 1.674                  | $0.5P_0$           | $0.67 \pm 0.03$              | $149 \pm 8$          |              | $180 \pm 32$ |
|        |          |     | 0.461   | 0.179          | 3.026                     | 2.917                  | $0.5P_0$           | $0.47 \pm 0.02$              | $211 \pm 9$          |              |              |
|        |          | 6   | 0.187   | 0.231          | 1.812                     | 1.703                  | $0.5P_0$           | $0.68 \pm 0.04$              | $146 \pm 8$          |              | $179 \pm 33$ |
|        |          |     | 0.461   | 0.178          | 3.017                     | 2.909                  | $0.5P_0$           | $0.47 \pm 0.02$              | $211 \pm 8$          |              |              |
|        |          | 8   | 0.187   | 0.228          | 1.867                     | 1.758                  | $0.5P_0$           | $0.71 \pm 0.03$              | $142 \pm 7$          |              |              |
|        |          |     | 0.461   | no data        |                           |                        |                    |                              |                      |              |              |
| 50     | $P_0$    | 1   | 0.187   | 0.579          | 1.223                     | 1.004                  | $0.5P_0$           | $0.40 \pm 0.03$              | $248 \pm 18$         | $232 \pm 18$ |              |
|        |          |     | 0.461   | 0.363          | 3.054                     | 2.835                  | $0.5P_0$           | $0.46 \pm 0.01$              | $217 \pm 5$          |              |              |
|        |          | 3   | 0.187   | 0.655          | 0.886                     | 0.743                  | $P_0$              | $0.30 \pm 0.01$              | $335 \pm 14$         |              | $311 \pm 25$ |
|        |          |     | 0.461   | 0.426          | 2.361                     | 2.143                  | $0.5P_0$           | $0.35 \pm 0.01$              | $287 \pm 8$          |              |              |
|        |          | 5   | 0.187   | 0.676          | 0.798                     | 0.655                  | $P_0$              | $0.26 \pm 0.01$              | $380 \pm 21$         |              | $373 \pm 15$ |
|        |          |     | 0.461   | 0.472          | 1.902                     | 1.684                  | $0.5P_0$           | $0.27 \pm 0.01$              | $365 \pm 15$         |              |              |
|        |          | 7   | 0.187   | 0.699          | 0.689                     | 0.546                  | $P_0$              | $0.22 \pm 0.01$              | $456 \pm 27$         |              | $435 \pm 25$ |
|        |          |     | 0.461   | 0.498          | 1.705                     | 1.486                  | $0.5P_0$           | $0.24 \pm 0.01$              | $414 \pm 10$         |              |              |
|        | $0.5P_0$ | 2   | 0.187   | 0.283          | 1.205                     | 0.986                  | $0.5P_0$           | $0.40 \pm 0.02$              | $252 \pm 10$         | $235 \pm 19$ |              |
|        |          |     | 0.461   | 0.176          | 3.050                     | 2.831                  | $0.5P_0$           | $0.46 \pm 0.01$              | $217 \pm 6$          |              |              |
|        |          | 4   | 0.187   | 0.300          | 1.015                     | 0.796                  | $0.5P_0$           | $0.32 \pm 0.02$              | $313 \pm 20$         |              | $291 \pm 24$ |
|        |          |     | 0.461   | 0.198          | 2.498                     | 2.279                  | $0.5P_0$           | $0.37 \pm 0.01$              | $270 \pm 10$         |              |              |
|        |          | 6   | 0.187   | 0.308          | 0.935                     | 0.717                  | $0.5P_0$           | $0.29 \pm 0.02$              | $347 \pm 27$         |              | $322 \pm 30$ |
|        |          |     | 0.461   | 0.206          | 2.295                     | 2.076                  | $0.5P_0$           | $0.34 \pm 0.02$              | $296 \pm 16$         |              |              |
|        |          | 8   | 0.187   | 0.311          | 0.881                     | 0.662                  | $0.5P_0$           | $0.27 \pm 0.02$              | $376 \pm 29$         |              | $347 \pm 33$ |
|        |          |     | 0.461   | 0.213          | 2.155                     | 1.936                  | $0.5P_0$           | $0.31 \pm 0.01$              | $318 \pm 15$         |              |              |
| 80     | $P_0$    | 1   | 0.187   | 0.507          | 1.638                     | 1.333                  | $0.5P_0$           | $0.54 \pm 0.02$              | $187 \pm 8$          | $195 \pm 9$  |              |
|        |          |     | 0.461   | 0.342          | 3.334                     | 3.030                  | $0.5P_0$           | $0.49 \pm 0.01$              | $203 \pm 5$          |              |              |
|        |          | 3   | 0.187   | 0.566          | 1.243                     | 0.939                  | $0.5P_0$           | $0.38 \pm 0.02$              | $265 \pm 12$         |              | $307 \pm 12$ |
|        |          |     | 0.461   | 0.423          | 2.331                     | 2.027                  | $0.5P_0$           | $0.33 \pm 0.01$              | $303 \pm 11$         |              |              |
|        |          | 5   | 0.187   | 0.597          | 1.075                     | 0.843                  | $P_0$              | $0.34 \pm 0.02$              | $295 \pm 20$         |              | $331 \pm 38$ |
|        |          |     | 0.461   | 0.460          | 1.980                     | 1.675                  | $0.5P_0$           | $0.27 \pm 0.01$              | $367 \pm 15$         |              |              |
|        |          | 7   | 0.187   | 0.602          | 1.035                     | 0.804                  | $P_0$              | $0.32 \pm 0.02$              | $310 \pm 19$         |              | $358 \pm 50$ |
|        |          |     | 0.461   | 0.475          | 1.820                     | 1.515                  | $0.5P_0$           | $0.25 \pm 0.01$              | $406 \pm 22$         |              |              |
|        | $0.5P_0$ | 2   | 0.187   | 0.231          | 1.785                     | 1.480                  | $0.5P_0$           | $0.59 \pm 0.03$              | $168 \pm 10$         | $183 \pm 16$ |              |
|        |          |     | 0.461   | 0.161          | 3.428                     | 3.123                  | $0.5P_0$           | $0.51 \pm 0.02$              | $197 \pm 9$          |              |              |
|        |          | 4   | 0.187   | 0.242          | 1.608                     | 1.304                  | $0.5P_0$           | $0.52 \pm 0.04$              | $191 \pm 15$         |              | $224 \pm 22$ |
|        |          |     | 0.461   | 0.181          | 2.819                     | 2.515                  | $0.5P_0$           | $0.41 \pm 0.02$              | $244 \pm 13$         |              |              |
|        |          | 6   | 0.187   | 0.242          | 1.586                     | 1.282                  | $0.5P_0$           | $0.51 \pm 0.04$              | $194 \pm 15$         |              | $229 \pm 36$ |
|        |          |     | 0.461   | 0.186          | 2.643                     | 2.338                  | $0.5P_0$           | $0.38 \pm 0.02$              | $263 \pm 13$         |              |              |
|        |          | 8   | 0.187   | 0.247          | 1.526                     | 1.222                  | $0.5P_0$           | $0.49 \pm 0.03$              | $204 \pm 13$         |              | $238 \pm 36$ |
|        |          |     | 0.461   | 0.189          | 2.554                     | 2.250                  | $0.5P_0$           | $0.37 \pm 0.02$              | $273 \pm 14$         |              |              |

<sup>a</sup> Each value is the average of 10 data points from 253–289 s. Errors are standard deviations.

**Table S12. Values of  $k_{1-a}$ ,  $k_{g-a}$ , and  $R_{g-a}$  for Successive Runs with Halloysite Sample**

| RH (%) | $P_{in}$ | Run | $S/S_c$ | $x_{out}(t)^a$ | $10^2 k_{1-a} (s^{-1})^a$ |                        |                    | $k_{g-a}$<br>( $cm s^{-1}$ ) | $R_{g-a} (s m^{-1})$ |              |
|--------|----------|-----|---------|----------------|---------------------------|------------------------|--------------------|------------------------------|----------------------|--------------|
|        |          |     |         |                | From eqn (21)             | After blank correction | $P_{in}$ for blank |                              | value                | average      |
| 20     | $P_0$    | 1   | 0.187   | 0.566          | 1.285                     | 1.176                  | $0.5P_0$           | $0.47 \pm 0.03$              | $212 \pm 11$         | $215 \pm 7$  |
|        |          |     | 0.461   | 0.373          | 2.933                     | 2.824                  | $0.5P_0$           | $0.46 \pm 0.01$              | $218 \pm 6$          |              |
|        |          | 3   | 0.187   | 0.614          | 1.049                     | 0.968                  | $P_0$              | $0.39 \pm 0.02$              | $257 \pm 10$         |              |
|        |          |     | 0.461   | 0.440          | 2.188                     | 2.079                  | $0.5P_0$           | $0.34 \pm 0.01$              | $296 \pm 8$          |              |
|        |          | 5   | 0.187   | 0.613          | 1.053                     | 0.972                  | $P_0$              | $0.39 \pm 0.01$              | $256 \pm 9$          |              |
|        |          |     | 0.461   | 0.447          | 2.113                     | 2.004                  | $0.5P_0$           | $0.33 \pm 0.01$              | $307 \pm 12$         |              |
|        |          | 7   | 0.187   | 0.609          | 1.043                     | 0.962                  | $P_0$              | $0.39 \pm 0.02$              | $259 \pm 12$         |              |
|        |          |     | 0.461   | 0.442          | 2.149                     | 2.040                  | $0.5P_0$           | $0.33 \pm 0.01$              | $301 \pm 12$         |              |
|        | $0.5P_0$ | 2   | 0.187   | 0.274          | 1.273                     | 1.164                  | $0.5P_0$           | $0.47 \pm 0.03$              | $214 \pm 15$         |              |
|        |          |     | 0.461   | 0.185          | 2.825                     | 2.717                  | $0.5P_0$           | $0.44 \pm 0.01$              | $226 \pm 6$          |              |
|        |          | 4   | 0.187   | 0.278          | 1.222                     | 1.114                  | $0.5P_0$           | $0.45 \pm 0.04$              | $224 \pm 18$         |              |
|        |          |     | 0.461   | 0.196          | 2.534                     | 2.425                  | $0.5P_0$           | $0.39 \pm 0.01$              | $253 \pm 9$          |              |
|        |          | 6   | 0.187   | 0.279          | 1.240                     | 1.131                  | $0.5P_0$           | $0.45 \pm 0.02$              | $220 \pm 11$         |              |
|        |          |     | 0.461   | 0.195          | 2.542                     | 2.433                  | $0.5P_0$           | $0.40 \pm 0.02$              | $253 \pm 12$         |              |
|        |          | 8   | 0.187   | 0.273          | 1.318                     | 1.209                  | $0.5P_0$           | $0.49 \pm 0.03$              | $206 \pm 14$         |              |
|        |          |     | 0.461   | 0.193          | 2.616                     | 2.507                  | $0.5P_0$           | $0.41 \pm 0.01$              | $245 \pm 9$          |              |
| 50     | $P_0$    | 1   | 0.187   | 0.579          | 1.177                     | 0.959                  | $0.5P_0$           | $0.39 \pm 0.02$              | $260 \pm 14$         | $273 \pm 15$ |
|        |          |     | 0.461   | 0.414          | 2.373                     | 2.154                  | $0.5P_0$           | $0.35 \pm 0.01$              | $285 \pm 8$          |              |
|        |          | 3   | 0.187   | 0.677          | 0.723                     | 0.581                  | $P_0$              | $0.23 \pm 0.02$              | $429 \pm 32$         |              |
|        |          |     | 0.461   | 0.507          | 1.611                     | 1.392                  | $0.5P_0$           | $0.23 \pm 0.01$              | $442 \pm 22$         |              |
|        |          | 5   | 0.187   | 0.672          | 0.737                     | 0.594                  | $P_0$              | $0.24 \pm 0.02$              | $419 \pm 28$         |              |
|        |          |     | 0.461   | 0.542          | 1.349                     | 1.130                  | $0.5P_0$           | $0.18 \pm 0.01$              | $544 \pm 26$         |              |
|        |          | 7   | 0.187   | 0.678          | 0.717                     | 0.574                  | $P_0$              | $0.23 \pm 0.02$              | $434 \pm 41$         |              |
|        |          |     | 0.461   | 0.547          | 1.303                     | 1.085                  | $0.5P_0$           | $0.18 \pm 0.01$              | $567 \pm 29$         |              |
|        | $0.5P_0$ | 2   | 0.187   | 0.274          | 1.238                     | 1.020                  | $0.5P_0$           | $0.41 \pm 0.03$              | $244 \pm 17$         |              |
|        |          |     | 0.461   | 0.196          | 2.462                     | 2.243                  | $0.5P_0$           | $0.36 \pm 0.02$              | $274 \pm 13$         |              |
|        |          | 4   | 0.187   | 0.285          | 1.092                     | 0.874                  | $0.5P_0$           | $0.35 \pm 0.03$              | $285 \pm 22$         |              |
|        |          |     | 0.461   | 0.218          | 2.003                     | 1.785                  | $0.5P_0$           | $0.29 \pm 0.01$              | $344 \pm 15$         |              |
|        |          | 6   | 0.187   | 0.284          | 1.094                     | 0.875                  | $0.5P_0$           | $0.35 \pm 0.02$              | $284 \pm 17$         |              |
|        |          |     | 0.461   | 0.223          | 1.917                     | 1.699                  | $0.5P_0$           | $0.28 \pm 0.02$              | $362 \pm 24$         |              |
|        |          | 8   | 0.187   | 0.286          | 1.061                     | 0.842                  | $0.5P_0$           | $0.34 \pm 0.04$              | $296 \pm 36$         |              |
|        |          |     | 0.461   | 0.222          | 1.917                     | 1.699                  | $0.5P_0$           | $0.27 \pm 0.02$              | $362 \pm 24$         |              |
| 80     | $P_0$    | 1   | 0.187   | 0.529          | 1.412                     | 1.108                  | $0.5P_0$           | $0.45 \pm 0.03$              | $225 \pm 14$         | $242 \pm 19$ |
|        |          |     | 0.461   | 0.387          | 2.682                     | 2.378                  | $0.5P_0$           | $0.39 \pm 0.02$              | $259 \pm 13$         |              |
|        |          | 3   | 0.187   | 0.590          | 1.080                     | 0.776                  | $0.5P_0$           | $0.31 \pm 0.03$              | $321 \pm 27$         |              |
|        |          |     | 0.461   | 0.474          | 1.814                     | 1.509                  | $0.5P_0$           | $0.25 \pm 0.01$              | $407 \pm 20$         |              |
|        |          | 5   | 0.187   | 0.607          | 1.003                     | 0.771                  | $P_0$              | $0.31 \pm 0.02$              | $323 \pm 23$         |              |
|        |          |     | 0.461   | 0.501          | 1.610                     | 1.306                  | $0.5P_0$           | $0.21 \pm 0.01$              | $471 \pm 28$         |              |
|        |          | 7   | 0.187   | 0.598          | 1.041                     | 0.810                  | $P_0$              | $0.33 \pm 0.03$              | $308 \pm 27$         |              |
|        |          |     | 0.461   | 0.507          | 1.544                     | 1.239                  | $0.5P_0$           | $0.20 \pm 0.01$              | $496 \pm 35$         |              |
|        | $0.5P_0$ | 2   | 0.187   | 0.229          | 1.788                     | 1.484                  | $0.5P_0$           | $0.60 \pm 0.05$              | $168 \pm 13$         |              |
|        |          |     | 0.461   | 0.172          | 3.027                     | 2.722                  | $0.5P_0$           | $0.44 \pm 0.02$              | $226 \pm 9$          |              |
|        |          | 4   | 0.187   | 0.235          | 1.684                     | 1.380                  | $0.5P_0$           | $0.55 \pm 0.03$              | $180 \pm 11$         |              |
|        |          |     | 0.461   | 0.184          | 2.684                     | 2.379                  | $0.5P_0$           | $0.39 \pm 0.02$              | $258 \pm 15$         |              |
|        |          | 6   | 0.187   | 0.236          | 1.668                     | 1.364                  | $0.5P_0$           | $0.55 \pm 0.03$              | $183 \pm 10$         |              |
|        |          |     | 0.461   | 0.193          | 2.465                     | 2.161                  | $0.5P_0$           | $0.35 \pm 0.02$              | $284 \pm 15$         |              |
|        |          | 8   | 0.187   | 0.234          | 1.673                     | 1.368                  | $0.5P_0$           | $0.55 \pm 0.05$              | $182 \pm 15$         |              |
|        |          |     | 0.461   | 0.194          | 2.454                     | 2.150                  | $0.5P_0$           | $0.35 \pm 0.02$              | $286 \pm 17$         |              |

<sup>a</sup> Each value is the average of 10 data points from 253–289 s. Errors are standard deviations.

**Table S13. Values of  $k_{1-a}$ ,  $k_{g-a}$ , and  $R_{g-a}$  for Successive Runs with AgroMAT AG-1 Sample**

| RH (%) | $P_{in}$ | Run | $S/S_c$ | $x_{out}(t)^a$ | $10^2 k_{1-a} (s^{-1})^a$ |                        |                    | $k_{g-a}$<br>( $cm s^{-1}$ ) | $R_{g-a} (s m^{-1})$ |              |              |             |
|--------|----------|-----|---------|----------------|---------------------------|------------------------|--------------------|------------------------------|----------------------|--------------|--------------|-------------|
|        |          |     |         |                | From eqn (21)             | After blank correction | $P_{in}$ for blank |                              | value                | average      |              |             |
| 20     | $P_0$    | 1   | 0.187   | 0.554          | 1.383                     | 1.274                  | $0.5P_0$           | $0.51 \pm 0.02$              | $195 \pm 7$          | $204 \pm 9$  |              |             |
|        |          |     | 0.461   | 0.370          | 2.999                     | 2.890                  | $0.5P_0$           | $0.47 \pm 0.01$              | $213 \pm 4$          |              |              |             |
|        |          | 3   | 0.187   | 0.583          | 1.218                     | 1.109                  | $0.5P_0$           | $0.45 \pm 0.02$              | $224 \pm 11$         |              | $235 \pm 12$ |             |
|        |          |     | 0.461   | 0.400          | 2.612                     | 2.503                  | $0.5P_0$           | $0.41 \pm 0.01$              | $246 \pm 5$          |              |              |             |
|        |          | 5   | 0.187   | 0.588          | 1.188                     | 1.079                  | $0.5P_0$           | $0.43 \pm 0.02$              | $231 \pm 10$         |              | $239 \pm 11$ |             |
|        |          |     | 0.461   | 0.403          | 2.586                     | 2.477                  | $0.5P_0$           | $0.40 \pm 0.01$              | $248 \pm 7$          |              |              |             |
|        |          | 7   | 0.187   | 0.585          | 1.203                     | 1.094                  | $0.5P_0$           | $0.44 \pm 0.01$              | $227 \pm 6$          |              | $246 \pm 19$ |             |
|        |          |     | 0.461   | 0.417          | 2.434                     | 2.325                  | $0.5P_0$           | $0.38 \pm 0.01$              | $264 \pm 5$          |              |              |             |
|        | $0.5P_0$ | 2   | 0.187   | 0.270          | 1.392                     | 1.283                  | $0.5P_0$           | $0.51 \pm 0.02$              | $194 \pm 6$          | $200 \pm 7$  |              |             |
|        |          |     | 0.461   | 0.176          | 3.099                     | 2.990                  | $0.5P_0$           | $0.49 \pm 0.01$              | $206 \pm 6$          |              |              |             |
|        |          | 4   | 0.187   | 0.267          | 1.409                     | 1.300                  | $0.5P_0$           | $0.52 \pm 0.01$              | $192 \pm 5$          | $200 \pm 9$  |              |             |
|        |          |     | 0.461   | 0.178          | 3.063                     | 2.955                  | $0.5P_0$           | $0.48 \pm 0.02$              | $208 \pm 7$          |              |              |             |
|        |          | 6   | 0.187   | 0.269          | 1.372                     | 1.263                  | $0.5P_0$           | $0.51 \pm 0.03$              | $197 \pm 12$         | $204 \pm 10$ |              |             |
|        |          |     | 0.461   | 0.179          | 3.020                     | 2.911                  | $0.5P_0$           | $0.47 \pm 0.01$              | $211 \pm 5$          |              |              |             |
|        |          | 8   | 0.187   | 0.265          | 1.428                     | 1.319                  | $0.5P_0$           | $0.53 \pm 0.02$              | $189 \pm 9$          | $202 \pm 14$ |              |             |
|        |          |     | 0.461   | 0.181          | 2.959                     | 2.850                  | $0.5P_0$           | $0.46 \pm 0.01$              | $216 \pm 6$          |              |              |             |
| 50     | $P_0$    | 1   | 0.187   | 0.504          | 1.650                     | 1.431                  | $0.5P_0$           | $0.57 \pm 0.02$              | $174 \pm 7$          | $204 \pm 31$ |              |             |
|        |          |     | 0.461   | 0.377          | 2.842                     | 2.624                  | $0.5P_0$           | $0.43 \pm 0.01$              | $234 \pm 6$          |              |              |             |
|        |          | 3   | 0.187   | 0.546          | 1.384                     | 1.165                  | $P_0$              | $0.47 \pm 0.02$              | $214 \pm 10$         |              | $243 \pm 30$ |             |
|        |          |     | 0.461   | 0.407          | 2.483                     | 2.264                  | $0.5P_0$           | $0.37 \pm 0.01$              | $272 \pm 9$          |              |              |             |
|        |          | 5   | 0.187   | 0.553          | 1.345                     | 1.127                  | $P_0$              | $0.45 \pm 0.02$              | $221 \pm 9$          |              | $245 \pm 25$ |             |
|        |          |     | 0.461   | 0.406          | 2.498                     | 2.280                  | $0.5P_0$           | $0.37 \pm 0.01$              | $270 \pm 7$          |              |              |             |
|        |          | 7   | 0.187   | no data        |                           |                        |                    |                              |                      |              |              | $266 \pm 6$ |
|        |          |     | 0.461   | 0.403          | 2.533                     | 2.315                  | $0.5P_0$           | $0.37 \pm 0.01$              |                      |              |              |             |
|        | $0.5P_0$ | 2   | 0.187   | 0.238          | 1.730                     | 1.512                  | $0.5P_0$           | $0.61 \pm 0.04$              | $165 \pm 10$         | $188 \pm 24$ |              |             |
|        |          |     | 0.461   | 0.173          | 3.125                     | 2.906                  | $0.5P_0$           | $0.47 \pm 0.02$              | $212 \pm 9$          |              |              |             |
|        |          | 4   | 0.187   | 0.236          | 1.793                     | 1.574                  | $0.5P_0$           | $0.63 \pm 0.03$              | $158 \pm 9$          | $187 \pm 29$ |              |             |
|        |          |     | 0.461   | 0.174          | 3.077                     | 2.859                  | $0.5P_0$           | $0.47 \pm 0.02$              | $215 \pm 11$         |              |              |             |
|        |          | 6   | 0.187   | 0.237          | 1.741                     | 1.522                  | $0.5P_0$           | $0.61 \pm 0.03$              | $164 \pm 7$          | $189 \pm 26$ |              |             |
|        |          |     | 0.461   | 0.174          | 3.093                     | 2.875                  | $0.5P_0$           | $0.47 \pm 0.02$              | $214 \pm 9$          |              |              |             |
|        |          | 8   | 0.187   | 0.250          | 1.553                     | 1.334                  | $0.5P_0$           | $0.54 \pm 0.02$              | $187 \pm 7$          | $201 \pm 16$ |              |             |
|        |          |     | 0.461   | 0.174          | 3.061                     | 2.843                  | $0.5P_0$           | $0.46 \pm 0.01$              | $216 \pm 6$          |              |              |             |
| 80     | $P_0$    | 1   | 0.187   | 0.479          | 1.830                     | 1.526                  | $0.5P_0$           | $0.61 \pm 0.03$              | $163 \pm 7$          | $171 \pm 9$  |              |             |
|        |          |     | 0.461   | 0.319          | 3.745                     | 3.440                  | $0.5P_0$           | $0.56 \pm 0.02$              | $179 \pm 5$          |              |              |             |
|        |          | 3   | 0.187   | 0.522          | 1.519                     | 1.215                  | $0.5P_0$           | $0.49 \pm 0.02$              | $205 \pm 9$          |              | $209 \pm 14$ |             |
|        |          |     | 0.461   | 0.361          | 3.071                     | 2.766                  | $0.5P_0$           | $0.45 \pm 0.01$              | $222 \pm 6$          |              |              |             |
|        |          | 5   | 0.187   | 0.522          | 1.507                     | 1.202                  | $0.5P_0$           | $0.48 \pm 0.02$              | $207 \pm 10$         |              | $219 \pm 13$ |             |
|        |          |     | 0.461   | 0.366          | 2.975                     | 2.671                  | $0.5P_0$           | $0.43 \pm 0.01$              | $230 \pm 6$          |              |              |             |
|        |          | 7   | 0.187   | 0.514          | 1.574                     | 1.270                  | $0.5P_0$           | $0.51 \pm 0.02$              | $196 \pm 7$          |              | $216 \pm 20$ |             |
|        |          |     | 0.461   | 0.370          | 2.912                     | 2.608                  | $0.5P_0$           | $0.42 \pm 0.01$              | $236 \pm 7$          |              |              |             |
|        | $0.5P_0$ | 2   | 0.187   | 0.212          | 2.140                     | 1.835                  | $0.5P_0$           | $0.74 \pm 0.02$              | $136 \pm 5$          | $153 \pm 17$ |              |             |
|        |          |     | 0.461   | 0.148          | 3.922                     | 3.618                  | $0.5P_0$           | $0.59 \pm 0.02$              | $170 \pm 5$          |              |              |             |
|        |          | 4   | 0.187   | 0.219          | 2.008                     | 1.704                  | $0.5P_0$           | $0.68 \pm 0.03$              | $146 \pm 6$          | $161 \pm 21$ |              |             |
|        |          |     | 0.461   | 0.154          | 3.701                     | 3.396                  | $0.5P_0$           | $0.55 \pm 0.02$              | $181 \pm 5$          |              |              |             |
|        |          | 6   | 0.187   | 0.217          | 2.065                     | 1.760                  | $0.5P_0$           | $0.71 \pm 0.03$              | $141 \pm 7$          | $159 \pm 19$ |              |             |
|        |          |     | 0.461   | 0.152          | 3.768                     | 3.463                  | $0.5P_0$           | $0.56 \pm 0.03$              | $178 \pm 8$          |              |              |             |
|        |          | 8   | 0.187   | 0.214          | 2.080                     | 1.775                  | $0.5P_0$           | $0.71 \pm 0.03$              | $140 \pm 5$          | $159 \pm 19$ |              |             |
|        |          |     | 0.461   | 0.153          | 3.761                     | 3.457                  | $0.5P_0$           | $0.56 \pm 0.02$              | $178 \pm 7$          |              |              |             |

<sup>a</sup> Each value is the average of 10 data points from 253–289 s. Errors are standard deviations.

**S7.5. Derivation of eqn (32).** The partial pressure of  $I_2$  above the surface was assumed to be  $P_{I_2-s}(t)$  in quasi-steady state conditions when the uptake of  $I_2$  occurred in the forward direction. Because the application of eqn (S24) assumes Langmuir-type adsorption,  $P_{I_2-s}(t)$  is approximated by eqn (S25).

$$\frac{dP_{I_2-s}(t)}{dt} = k_m(P_{I_2}(t) - P_{I_2-s}(t)) - k_a \left\{ (1 - \theta(t)) \times P_{I_2-s}(t) - \frac{\theta(t)}{K_{ads}} \right\} \approx 0 \quad (S24)$$

$$P_{I_2-s}(t) = \frac{k_m P_{I_2}(t) + \frac{k_a}{K_{ads}} \theta(t)}{k_m + k_a(1 - \theta(t))} \quad (S25)$$

where  $k_a$  is the rate of adsorption of  $I_2$  on the clay surface. Thus, the forward rate,  $U_f$ , is thus given by

$$U_f = k_m(P_{I_2}(t) - P_{I_2-s}(t)) = \frac{1}{\frac{1}{k_m} + \frac{1}{k_a(1 - \theta(t))}} \times \left( P_{I_2}(t) - \frac{\theta(t)}{K_{ads}(1 - \theta(t))} \right) \quad (S26)$$

Letting  $U_b$  be the backward rate,  $U_b$  is given similarly by  $-U_f$ . When adsorption proceeds very rapidly, that is,  $k_m \ll k_a(1 - \theta(t))$ , eqn (S26) is approximated by

$$U_f = -U_b = k_m \times \left( P_{I_2}(t) - \frac{\theta(t)}{K_{ads}(1 - \theta(t))} \right) \quad (S27)$$

Representation of the partial pressure of  $I_2$  by  $x_{out}(t)$  instead of  $P_{I_2}$  in eqn (S27) gives

$$U = \frac{k_m \times \left( x_{out}(t) - \frac{\theta(t)}{K_{ads}(1 - \theta(t))} \right)}{x_{out}(t)} \times x_{out}(t) \quad (S28)$$

where  $U$  and  $K_{ads}$  are the forward rate and the adsorption equilibrium coefficients for  $x_{out}(t)$ , which is the ratio of the partial pressure of  $I_2$  to  $P_0$  ( $4.0 \times 10^{-7}$  atm). Based on analogy with eqn (S24), we assumed a  $k_m(t)$  determined with eqn (32). It should be noted that  $k_{ma}$  in eqn (32) is a parameter used to determine  $k_m(t)$  and may be larger than the actual values of  $k_m$  or  $k_m(t)$ .

### S7.6. Parameters obtained in the simulation

**Table S14.** Parameters used to reproduce both the time-series of  $x_m(t)$  with small and large basins in runs 1–5 for each clay sample, RRS for each fitting result, and deposition rates and surface resistances calculated from them. Uncertainties of parameters are 90% at confidence level for the fitting procedure.

|                                              | RH (%) | Illite          | Allophane       | Montmorillonite  | Kaolinite        | Halloysite      | AgroMAT AG-1     |
|----------------------------------------------|--------|-----------------|-----------------|------------------|------------------|-----------------|------------------|
| $k_{ma}$<br>( $\text{cm s}^{-1}$ )           | 20     | $7.42 \pm 0.43$ | $7.08 \pm 0.56$ | $2.24 \pm 0.06$  | $2.10 \pm 0.24$  | $1.18 \pm 0.11$ | $4.61 \pm 0.79$  |
|                                              | 50     | $8.44 \pm 0.80$ | $2.47 \pm 0.06$ | $2.25 \pm 0.03$  | $1.58 \pm 0.02$  | $2.51 \pm 0.16$ | $1.22 \pm 0.04$  |
|                                              | 80     | $1.81 \pm 0.19$ | $3.74 \pm 0.20$ | $3.48 \pm 0.05$  | $4.34 \pm 0.36$  | $5.51 \pm 0.26$ | $2.05 \pm 0.05$  |
| $K_{ads}$<br>( $\text{atm}^{-1}$ )*          | 20     | $1.34 \pm 0.03$ | $1.11 \pm 0.04$ | $0.75 \pm 0.02$  | $0.84 \pm 0.06$  | $0.54 \pm 0.04$ | $0.63 \pm 0.02$  |
|                                              | 50     | $1.24 \pm 0.02$ | $1.07 \pm 0.02$ | $1.03 \pm 0.01$  | $0.81 \pm 0.01$  | $1.25 \pm 0.03$ | $0.74 \pm 0.02$  |
|                                              | 80     | $1.17 \pm 0.03$ | $1.31 \pm 0.03$ | $1.27 \pm 0.02$  | $1.19 \pm 0.02$  | $1.59 \pm 0.04$ | $0.84 \pm 0.02$  |
| $10^2 k_f$<br>( $\text{s}^{-1}$ )            | 20     | $1.38 \pm 0.02$ | $1.30 \pm 0.03$ | $1.16 \pm 0.02$  | $1.18 \pm 0.05$  | $1.21 \pm 0.02$ | $2.33 \pm 0.03$  |
|                                              | 50     | $1.24 \pm 0.02$ | $0.77 \pm 0.01$ | $0.89 \pm 0.01$  | $1.05 \pm 0.02$  | $0.81 \pm 0.03$ | $1.47 \pm 0.02$  |
|                                              | 80     | $0.77 \pm 0.02$ | $0.55 \pm 0.02$ | $0.69 \pm 0.01$  | $0.63 \pm 0.02$  | $0.59 \pm 0.01$ | $1.39 \pm 0.03$  |
| $K_{pads}$                                   | 20     | $6.20 \pm 0.12$ | $5.06 \pm 0.20$ | $10.50 \pm 0.34$ | $4.09 \pm 0.08$  | $5.18 \pm 0.21$ | $12.70 \pm 0.44$ |
|                                              | 50     | $5.44 \pm 0.12$ | $3.73 \pm 0.10$ | $5.08 \pm 0.14$  | $12.03 \pm 0.56$ | $1.95 \pm 0.05$ | $6.75 \pm 0.11$  |
|                                              | 80     | $4.32 \pm 0.15$ | $1.78 \pm 0.06$ | $5.11 \pm 0.15$  | $4.05 \pm 0.24$  | $1.86 \pm 0.04$ | $6.78 \pm 0.18$  |
| $10^3 k_{iso}$<br>( $\text{s}^{-1}$ )        | 20     | $4.86 \pm 0.08$ | $5.31 \pm 0.20$ | $9.04 \pm 0.14$  | $8.53 \pm 0.39$  | $7.40 \pm 0.19$ | $6.09 \pm 0.32$  |
|                                              | 50     | $4.79 \pm 0.10$ | $6.07 \pm 0.11$ | $8.12 \pm 0.12$  | $13.05 \pm 0.19$ | $7.91 \pm 0.15$ | $4.48 \pm 0.16$  |
|                                              | 80     | $3.88 \pm 0.09$ | $5.59 \pm 0.11$ | $5.47 \pm 0.09$  | $7.65 \pm 0.16$  | $4.80 \pm 0.07$ | $5.84 \pm 0.16$  |
| $N_{iso}$ *                                  | 20     | $3.23 \pm 0.13$ | $0.97 \pm 0.08$ | $1.11 \pm 0.05$  | $2.56 \pm 0.28$  | $0.75 \pm 0.07$ | $1.17 \pm 0.15$  |
|                                              | 50     | $0.87 \pm 0.06$ | $1.04 \pm 0.05$ | $1.02 \pm 0.03$  | $1.93 \pm 0.07$  | $1.59 \pm 0.04$ | $0.58 \pm 0.04$  |
|                                              | 80     | $0.68 \pm 0.05$ | $1.08 \pm 0.04$ | $1.01 \pm 0.03$  | $1.79 \pm 0.10$  | $1.05 \pm 0.05$ | $0.77 \pm 0.07$  |
| $10^3 k_{loss-p}$<br>( $\text{s}^{-1}$ )     | 20     | $2.23 \pm 0.02$ | $2.04 \pm 0.04$ | $2.23 \pm 0.04$  | $2.61 \pm 0.17$  | $2.25 \pm 0.05$ | $2.33 \pm 0.03$  |
|                                              | 50     | $2.02 \pm 0.04$ | $1.98 \pm 0.04$ | $2.16 \pm 0.06$  | $1.73 \pm 0.06$  | $2.18 \pm 0.07$ | $2.07 \pm 0.03$  |
|                                              | 80     | $2.18 \pm 0.04$ | $1.94 \pm 0.07$ | $1.77 \pm 0.04$  | $1.71 \pm 0.07$  | $2.02 \pm 0.06$ | $2.34 \pm 0.08$  |
| RSS                                          | 20     | 6497            | 18741           | 3770             | 31720            | 10989           | 4967             |
|                                              | 50     | 5206            | 5524            | 3899             | 3181             | 6261            | 7079             |
|                                              | 80     | 6044            | 6605            | 2940             | 6713             | 7844            | 9826             |
| $S/S_c$                                      |        | 0.187 0.461     | 0.187 0.461     | 0.187 0.461      | 0.187 0.461      | 0.187 0.461     | 0.187 0.461      |
| $10^3 q_\infty$<br>( $\text{nmol cm}^{-2}$ ) | 20     | 0.87 0.70       | 1.32 0.88       | 0.73 0.73        | 1.33 0.86        | 1.53 1.21       | 0.79 0.67        |
|                                              | 50     | 0.78 0.89       | 0.99 0.96       | 0.66 0.76        | 0.69 0.68        | 0.89 0.64       | 1.30 0.90        |
|                                              | 80     | 1.18 1.07       | 1.09 0.97       | 0.84 0.82        | 1.12 0.80        | 1.19 0.75       | 1.23 0.93        |
| $k_{g0}$<br>( $\text{cm s}^{-1}$ )           | 20     | 0.79 0.64       | 0.94 0.63       | 0.54 0.53        | 0.91 0.59        | 0.63 0.50       | 0.56 0.47        |
|                                              | 50     | 0.59 0.68       | 0.60 0.58       | 0.51 0.59        | 0.64 0.63        | 0.68 0.50       | 0.64 0.44        |
|                                              | 80     | 0.65 0.59       | 0.64 0.57       | 0.58 0.57        | 0.84 0.60        | 0.77 0.49       | 0.79 0.60        |
| $k_g$<br>( $\text{cm s}^{-1}$ )              | 20     | 0.46 0.37       | 0.49 0.33       | 0.25 0.25        | 0.36 0.23        | 0.28 0.22       | 0.38 0.32        |
|                                              | 50     | 0.32 0.37       | 0.23 0.22       | 0.19 0.22        | 0.22 0.22        | 0.18 0.13       | 0.39 0.27        |
|                                              | 80     | 0.34 0.30       | 0.17 0.16       | 0.24 0.24        | 0.25 0.18        | 0.25 0.16       | 0.44 0.33        |
| $R_{g-clay-0}$<br>( $\text{s m}^{-1}$ )**    | 20     | $141 \pm 15$    | $133 \pm 26$    | $186 \pm 1$      | $138 \pm 29$     | $178 \pm 21$    | $196 \pm 17$     |
|                                              | 50     | $158 \pm 11$    | $168 \pm 3$     | $181 \pm 14$     | $156 \pm 1$      | $173 \pm 28$    | $188 \pm 35$     |
|                                              | 80     | $161 \pm 8$     | $165 \pm 9$     | $173 \pm 2$      | $142 \pm 23$     | $167 \pm 38$    | $145 \pm 20$     |
| $R_{g-clay}$<br>( $\text{s m}^{-1}$ )**      | 20     | $241 \pm 26$    | $255 \pm 51$    | $402 \pm 2$      | $348 \pm 74$     | $401 \pm 46$    | $287 \pm 25$     |
|                                              | 50     | $288 \pm 20$    | $440 \pm 8$     | $481 \pm 36$     | $447 \pm 3$      | $666 \pm 107$   | $305 \pm 56$     |
|                                              | 80     | $308 \pm 15$    | $607 \pm 34$    | $414 \pm 4$      | $470 \pm 77$     | $515 \pm 116$   | $260 \pm 36$     |

\* Unit is represented as a fraction of  $q_\infty$ .

\*\* Uncertainties ( $\pm$ ) are standard deviations of two values with  $S/S_c = 0.187$  and  $0.461$ .

**S7.7. Derivation of eqn (37).** The assumed scheme for the uptake process of I<sub>2</sub> on clay samples is illustrated in Scheme S1, where M1 is gaseous I<sub>2</sub>, M2 is I<sub>2</sub> adsorbed on the surface in the first stage, and M3 is I<sub>2</sub> adsorbed in the interior in the second stage. Let  $n_1$ ,  $n_2$ , and  $n_3$  be concentrations of M1, M2, and M3, respectively, where the units of  $n_2$  and  $n_3$  are the same as the units of  $n_1$ . Values of  $n_1$ – $n_3$  are represented using variables in eqn (31)–(36) as shown in Table S15, because  $\theta(t)$  and  $\varphi(t)$  are defined as a fraction of  $q_\infty$  and because  $q_\infty$  is represented by  $q_\infty/B_{\text{pm}}$  if the unit of  $n_1$  is used for  $q_\infty$ . When  $n_1$  is low (e.g., I<sub>2</sub> as in the atmosphere), each rate is expected to be proportional to each concentration of  $n_1$ ,  $n_2$ , or  $n_3$ . Because  $k_m(t)$  assumes that exchanges between M1 and M2 are reversible (section S7.5), the parameters of  $k_{1f}$ ,  $k_{1b}$ ,  $k_{2f}$ ,  $k_{2b}$ ,  $k_{2d}$ , and  $k_{3d}$  in Scheme 1 are related to the parameters in eqn (31)–(36) (Table S15) for low concentrations of I<sub>2</sub>.

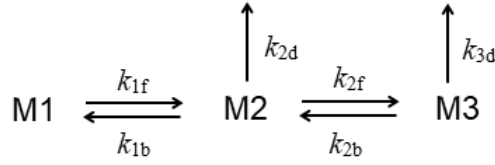

**Scheme S1.** Scheme for process of uptake of I<sub>2</sub> onto clay samples.

**Table S15.** Comparison of variables and parameters between Scheme S1 and eqn (31)–(36)

| Scheme S1 | $n_1$               | $n_2$                                     | $n_3$                                      | $k_{1f}$        | $k_{1b}$                                                              | $k_{2f}$ | $k_{2b}$                      | $k_{2d}$               | $k_{3d}$            |
|-----------|---------------------|-------------------------------------------|--------------------------------------------|-----------------|-----------------------------------------------------------------------|----------|-------------------------------|------------------------|---------------------|
| eqs 31–36 | $x_{\text{out}}(t)$ | $\frac{q_\infty}{B_{\text{pm}}}\theta(t)$ | $\frac{q_\infty}{B_{\text{pm}}}\varphi(t)$ | $k_{\text{ma}}$ | $\frac{B_{\text{pm}}}{q_\infty} \frac{k_{\text{ma}}}{K_{\text{ads}}}$ | $k_f$    | $\frac{k_f}{K_{\text{pads}}}$ | $k_{\text{loss-s}}(t)$ | $k_{\text{loss-p}}$ |

Under steady state conditions, the uptake rate of M1,  $U_{\text{M1}}$ , and the first-order rate constant for the uptake,  $k_{1u}$ , are represented by

$$U_{\text{M1}} = k_{1u}n_1 = k_{2d}n_2 + k_{3d}n_3 \quad (\text{S29})$$

Because M2–M3 are in steady states, the following equations were applied.

$$k_{1f}n_1 - (k_{1b} + k_{2f} + k_{2d}) \times n_2 + k_{2b}n_3 = 0 \quad (\text{S30})$$

$$k_{2f}n_2 - (k_{2b} + k_{3d}) \times n_3 = 0 \quad (\text{S31})$$

From eqn (S30) and (S31),  $n_2$  and  $n_3$  are given by  $n_1$  as follows:

$$n_2 = \frac{k_{1f}(k_{2b} + k_{3d})}{k_{1b}k_{2b} + k_{1b}k_{3d} + k_{2f}k_{3d} + k_{2b}k_{2d} + k_{2d}k_{3d}} \times n_1 \quad (\text{S32})$$

$$n_3 = \frac{k_{1f}k_{2f}}{k_{1b}k_{2b} + k_{1b}k_{3d} + k_{2f}k_{3d} + k_{2b}k_{2d} + k_{2d}k_{3d}} \times n_1 \quad (\text{S33})$$

Substituting eqn (S32) and (S33) into eqn (S29) yields

$$U_{\text{M1}} = \left\{ \frac{k_{2d}}{\frac{1}{K_1} + \frac{K_2 k_{3d}}{k_{1f}(1 + \frac{k_{3d}}{k_{2b}})} + k_{1f}} + \frac{1}{\frac{1}{K_1 K_2 k_{3d}} + \frac{1}{K_1 k_{2f}} + \frac{1}{k_{1f}} + k_{2d} \left( \frac{1}{K_2 k_{1f} k_{3d}} + \frac{1}{k_{1f} k_{2f}} \right)} \right\} \times n_1 \quad (\text{S34})$$



where  $K_1 = k_{1f}/k_{1b}$  and  $K_2 = k_{2f}/k_{2b}$ . From Table S15, eqn (S34) yields

$$U_{M1} = \left\{ \frac{\frac{q_\infty}{B_{pm}} k_{\text{loss-s}}(t)}{\frac{1}{K_{\text{ads}}} + \frac{1}{\frac{k_{\text{ma}}}{K_{\text{pads}} k_{\text{loss-p}}} + \frac{k_{\text{ma}}}{k_{2f}}} + \frac{k_{\text{loss-s}}(t)}{k_{\text{ma}}}} + \frac{\frac{q_\infty}{B_{pm}}}{\frac{q_\infty}{B_{pm}} \frac{1}{k_{\text{ma}}} + \frac{1}{K_{\text{ads}} k_f} + \frac{1}{K_{\text{ads}} K_{\text{pads}} k_{\text{loss-p}}} + \frac{k_{\text{loss-s}}(t)}{k_{\text{ma}} k_f} \left( \frac{k_f}{K_{\text{pads}} k_{\text{loss-p}}} + 1 \right)}} \right\} \times n_1 \quad (\text{S35})$$

Comparing eqn (S35) with eqn (S29) gives eqn (37).

### S7.8. Simulation of consecutive runs 1–5 for the same clay sample.

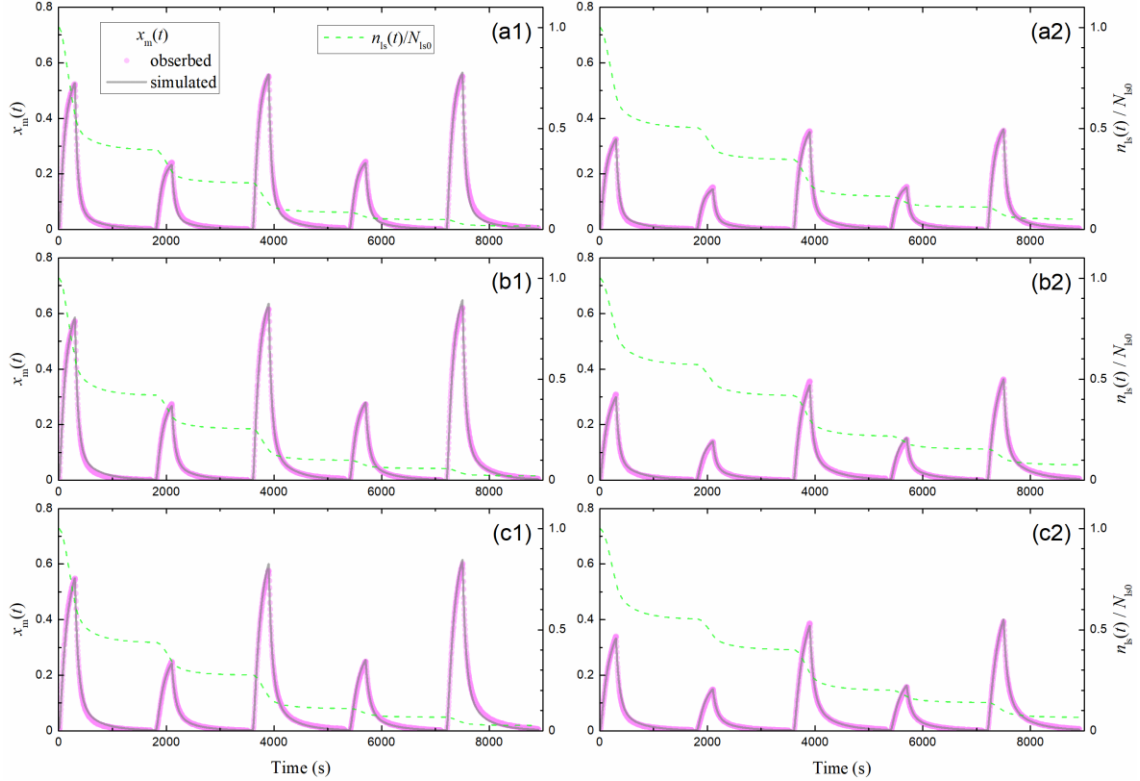

**Figure S12.** Time series of  $x_m(t)$  in  $I_2$ -air(s) observed (pink circles) and simulated (grey curves) in runs 1–5 with each illite sample at (a) 20% RH, (b) 50% RH, and (c) 80% RH in small basins ( $S/S_c$ , 0.187; panels a1, b1, and c1) and large basins ( $S/S_c$ , 0.461; panels a2, b2, and c2). Dashed curves show time series of residence ratios of active sites for  $I_2$  loss,  $n_{is}(t)/N_{is0}$ . Temporal duration of each run was about 1700 s and there were several minutes between runs; however, each panel plots all data of runs 1–5 in consecutive at 1800-s intervals for convenience.

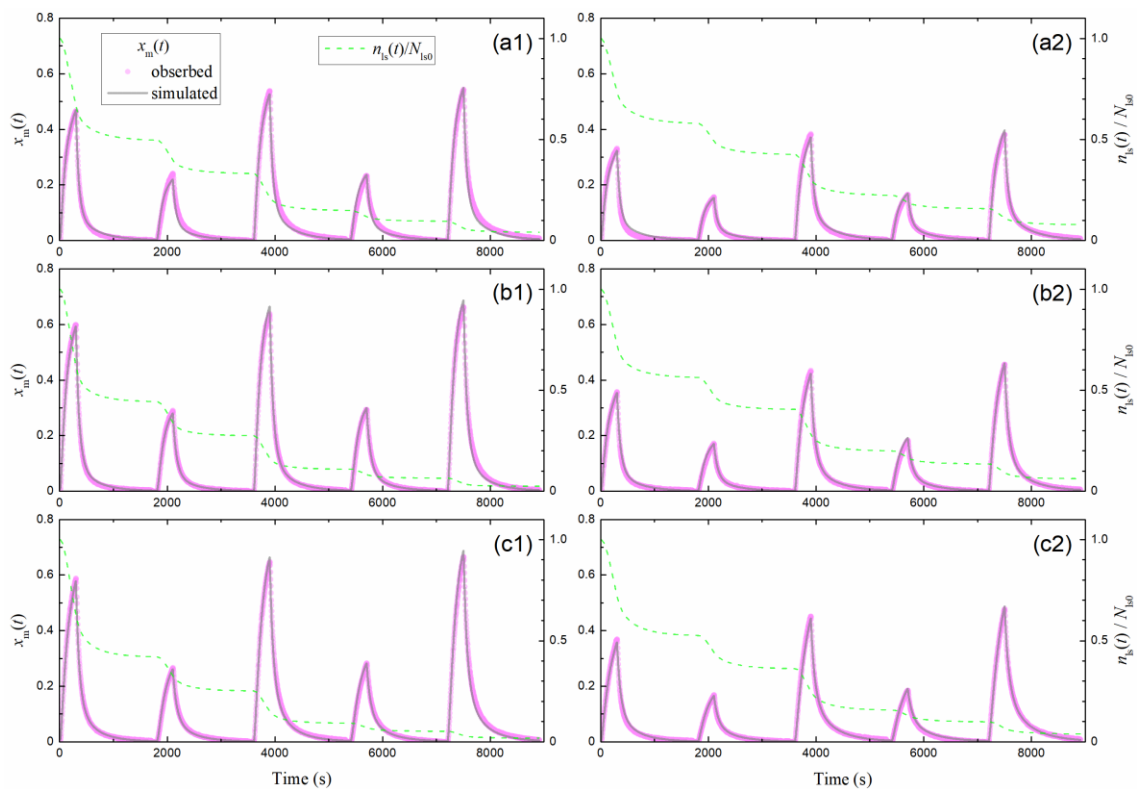

**Figure S13.** Same as Figure S12, but for runs 1–5 for allophane samples.

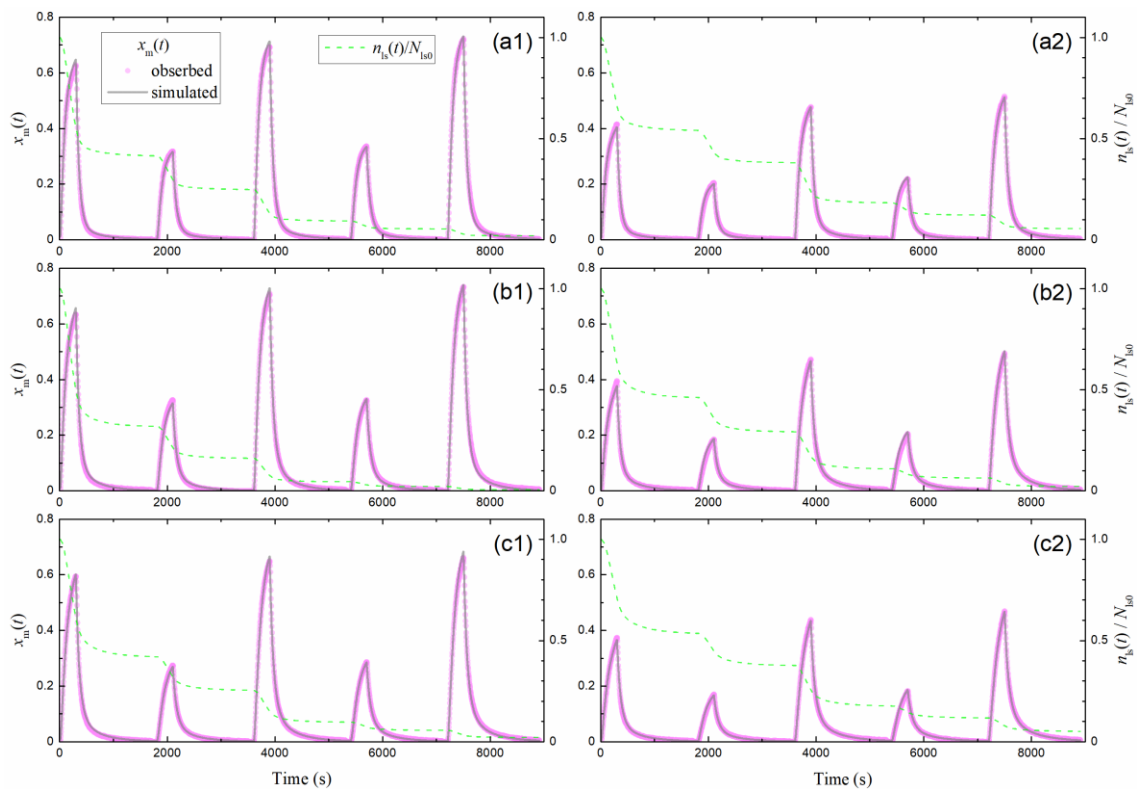

**Figure S14.** Same as Figure S12, but for runs 1–5 for montmorillonite samples.

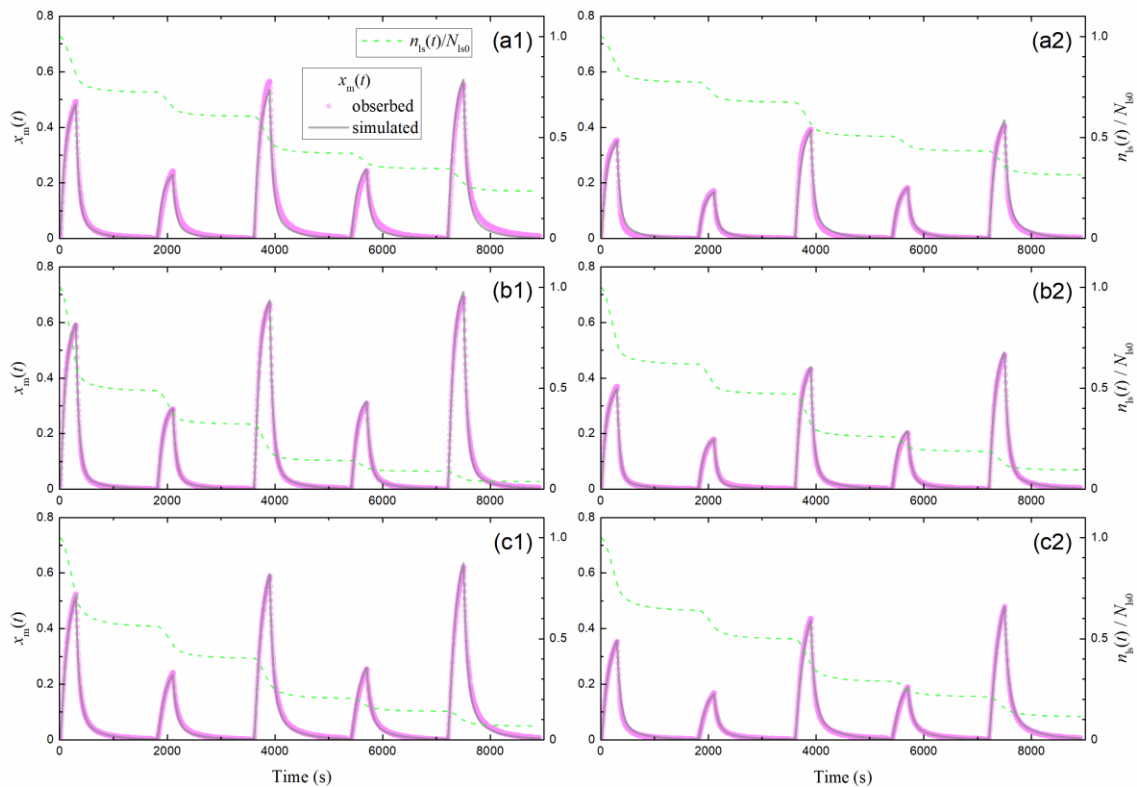

**Figure S15.** Same as Figure S12, but for runs 1–5 for kaolinite samples.

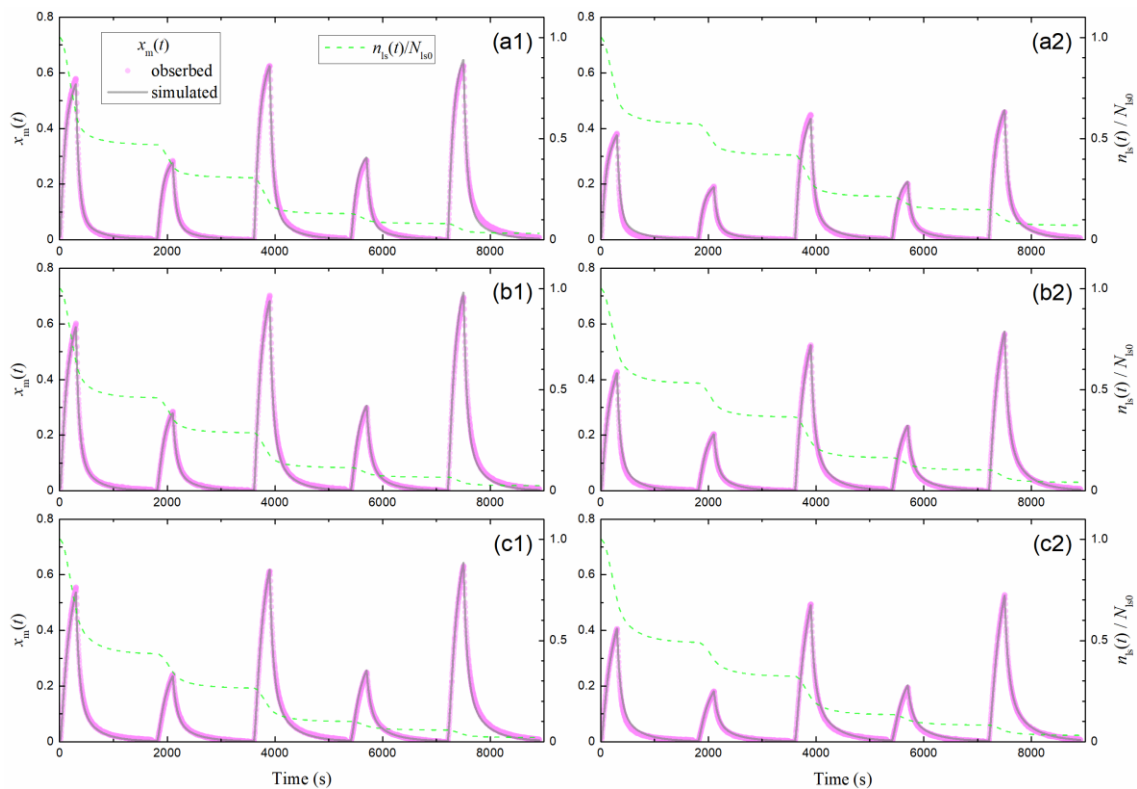

**Figure S16.** Same as Figure S12, but for runs 1–5 for halloysite samples.

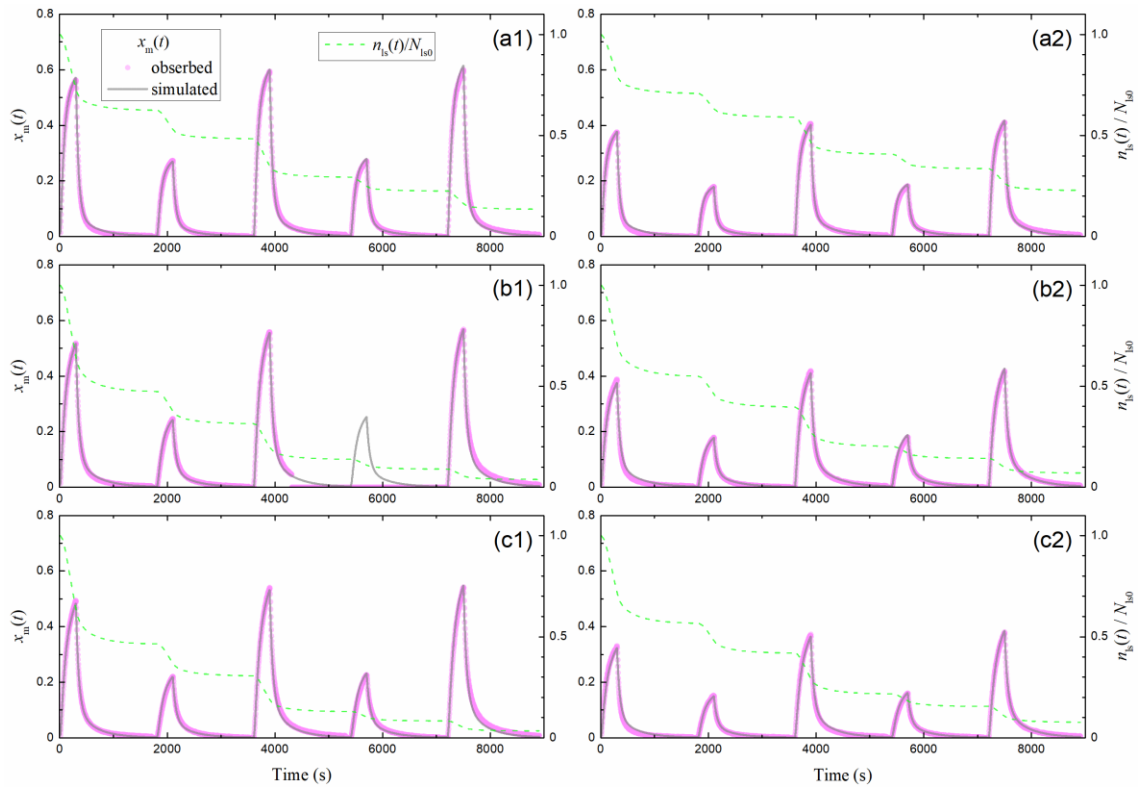

**Figure S17.** Same as Figure S12, but for runs 1–5 for AgroMAT AG-1 samples. The observed  $x_m(t)$  data at 4313–7197 s with the small basin at 50% RH (panel b1) are missing because the baseline was changed at 713 s in run 3, and the data at 713–1709 s for run 3 and all data in run 4 are missing.

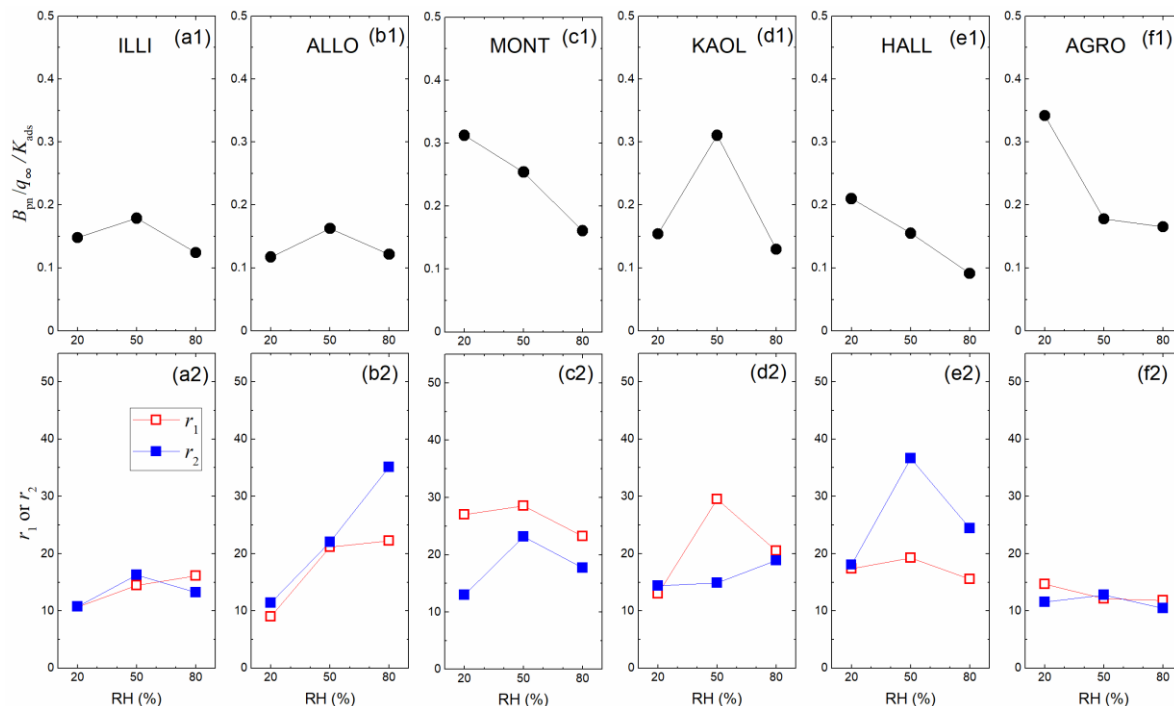

**Figure S18.**  $B_{pn}/q_{\infty}/K_{ads}$  (panels 1),  $r_1$ , and  $r_2$  (panels 2) versus RH for  $I_2$ -air(s) mixtures flowing over small basins of (a) illite, (b) allophane, (c) montmorillonite, (d) kaolinite, (e) halloysite, and (f) AgroMAT AG-1 samples.  $B_{pn}/q_{\infty}/K_{ads}$ ,  $r_1$ , and  $r_2$  are calculated from the parameters obtained in the simulation (Table S14).

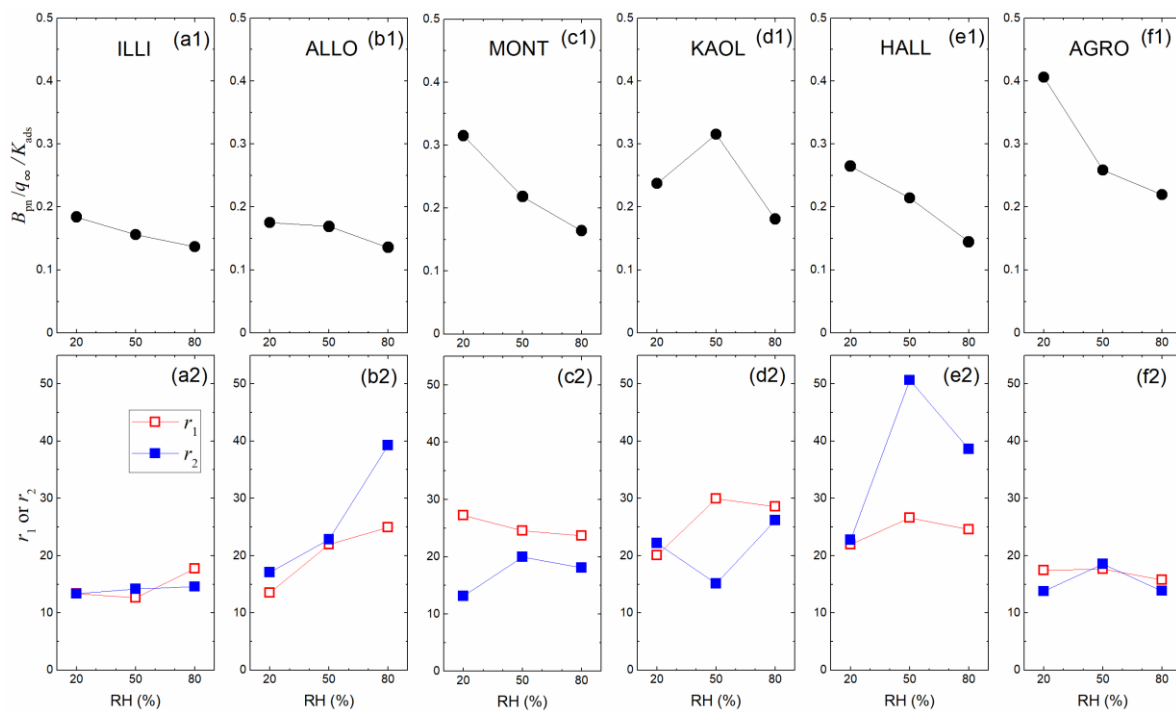

**Figure S19.** Same as Figure S18, but for  $I_2$ -air(s) mixtures flowing over large basins.

## S8. SUPPORTING INFORMATION FOR SECTION 3.4

### S8.1. Parameters Used to Calculate Non-stomatal Resistance above each LUC.

**Table S16. Reference Values of Parameters for Calculating Non-stomatal Resistance above LUCs<sup>8</sup>**

|                                                      | LUC                   |                           |                           |
|------------------------------------------------------|-----------------------|---------------------------|---------------------------|
|                                                      | short grass and forbs | evergreen broadleaf trees | deciduous broadleaf trees |
| $R_{ac0}$ (s m <sup>-1</sup> )                       | 20                    | 250                       | 112                       |
| $LAI$                                                | 1                     | 6                         | 0.5                       |
| $R_{cutd0}$ for SO <sub>2</sub> (s m <sup>-1</sup> ) | 1000                  | 2500                      | 2500                      |
| $R_g$ for SO <sub>2</sub> (s m <sup>-1</sup> )       | 200                   | 100                       | 200                       |
| roughness length, $z_0$ (m)                          | 0.04                  | 2.0                       | 0.4–1.0                   |

In Table S16,  $R_{ac0}$  for deciduous broadleaf trees is calculated by

$$R_{ac0}(t) = R_{ac0}(\min) + \frac{LAI(t) - LAI(\min)}{LAI(\max) - LAI(\min)} \times [R_{ac0}(\max) - R_{ac0}(\min)] \quad (S36)$$

where  $R_{ac0}(t)$  represents the  $R_{ac0}$  value at any day of the year and is set at a day in March;  $R_{ac0}(\min)$  and  $R_{ac0}(\max)$  are minimum and maximum  $R_{ac0}$  values for deciduous broadleaf trees and are 100 and 250 s m<sup>-1</sup>, respectively;  $LAI(t)$  is 0.5, the reference value of  $LAI$  in March;  $LAI(\min)$  and  $LAI(\max)$  are minimum and maximum  $LAI$  values and are 0.1 and 5, respectively, as seen in Figure 2 of Zhang et al.<sup>8</sup>

Values of  $u_*$  are related to the wind velocity ( $u_A$ , in m s<sup>-1</sup>) at a certain altitude ( $z_A$ , in m) by

$$u_* = \frac{\kappa u_A}{\ln(z_A/z_0)} \quad (S37)$$

where  $\kappa$  is von Karmen's constant, equal to 0.4, and  $z_0$  is roughness length. Table S17 lists the  $u_*$  values calculated from the  $u_A$  values at 10 m height for each LUC by eqn (S37).

**Table S17. Values of  $u_*$  for Each LUC**

| $u_A$ at 10 m<br>(m s <sup>-1</sup> ) | $u_*$ (m s <sup>-1</sup> ) |                           |                           |
|---------------------------------------|----------------------------|---------------------------|---------------------------|
|                                       | Short grass and forbs      | Evergreen broadleaf trees | Deciduous broadleaf trees |
| 2                                     | 0.14                       | 0.50                      | 0.25–0.35                 |
| 4                                     | 0.29                       | 0.99                      | 0.50–0.69                 |
| 6                                     | 0.43                       | 1.49                      | 0.75–1.04                 |
| 8                                     | 0.58                       | 1.99                      | 0.99–1.39                 |
| 10                                    | 0.72                       | 2.49                      | 1.24–1.74                 |
| 12                                    | 0.87                       | 2.98                      | 1.49–2.08                 |
| 14                                    | 1.01                       | 3.48                      | 1.74–2.43                 |
| 16                                    | 1.16                       | 3.98                      | 1.99–2.78                 |
| 18                                    | 1.30                       | 4.47                      | 2.24–3.13                 |
| 20                                    | 1.45                       | 4.97                      | 2.49–3.47                 |

### References

1. I. Sanemasa, T. Kobayashi, Y. P. Cheng and T. Deguchi, Equilibrium solubilities of iodine vapor in water, *Bull. Chem. Soc. Jpn.*, 1984, **57**, 1352-1357.
2. T. L. Allen and R. M. Keefer, The formation of hypoiodous acid and hydrated iodine cation by the hydrolysis of iodine, *J. Am. Chem. Soc.*, 1955, **77**, 2957-2960.
3. R. Sander, Compilation of Henry's law constants (version 4.0) for water as solvent, *Atmos. Chem. Phys.*, 2015, **15**, 4399-4981.
4. W. Eguchi, M. Adachi and M. Yoneda, Dependency of partition equilibrium of iodine between air and aqueous solution containing sodium hydroxide upon temperature and concentration, *J. Chem. Eng. Jpn.*, 1974, **6**, 389-396.
5. C. R. Reid, J. M. Prausnitz and B. E. Poling, *The properties of gases and liquids*, 5th edn., McGraw-Hill, New York, 1987.
6. A. Takami, T. Kondo, A. Kado and S. Koda, The uptake coefficient of I<sub>2</sub> on various aqueous surfaces, *J. Atmos. Chem.*, 2001, **39**, 139-153.
7. A. E. Burgess and J. C. Davidson, Kinetics of the rapid reaction between iodine and ascorbic acid in aqueous solution using UV-Visible absorbance and titration by an iodine clock, *J. Chem. Educ.*, 2014, **91**, 300-304.
8. L. Zhang, J. R. Brook and R. Vet, A revised parameterization for gaseous dry deposition in air-quality models, *Atmos. Chem. Phys.*, 2003, **3**, 2067-2082.
